# Supplementary material for: Noncovalent interactions underlying binary mixtures of amino acid based ionic liquids: insights from theory
Source: Royal Society of Chemistry journal article supplement (doi:10.1039/c7cp04323f), 2017-01-01
Supplement: c7cp04323f1.pdf [file c7cp04323f1.pdf]

## Noncovalent Interactions Underlying Binary Mixtures of Amino Acid based Ionic Liquids: Insights from Theory.

Soniya S. Rao<sup>a</sup>, Libero J. Bartolotti<sup>b</sup> and Shridhar P. Gejji<sup>a\*</sup>

<sup>a</sup> Department of Chemistry, Savitribai Phule Pune University, Pune 411 007, India.

<sup>b</sup> Department of Chemistry, East Carolina University, Greenville, North Carolina 27858, United States.

---

### Supporting Information

- Figure S1** Optimized structures of different conformers of [Bmim][Asp] ion pairs.
- Figure S2** Optimized structures of different conformers of [Bmim][Asn] ion pairs.
- Figure S3** Optimized structures of different conformers of [Bmim][Glu] ion pairs.
- Figure S4** Optimized structures of different conformers of [Bmim][Gln] ion pairs.
- Table S1** Interaction energies (in kJ mol<sup>-1</sup>) and an estimation of the dispersion contribution,  $\Delta E_{\text{disp}}$  for (a) [Bmim][Asp] (b) [Bmim][Asn] (c) [MBmim][Glu] and (d) [Bmim][Gln] ion pairs.
- Figure S5** Optimized structures of different [Bmim]<sub>2</sub>[Glu][Gln] conformers with different cation orientations. Values in parentheses represent relative stabilization energies with respect to the lowest energy conformer in kJ mol<sup>-1</sup>.
- Table S2** Dispersion corrected relative stabilization energies (R.S.E in kJ mol<sup>-1</sup>) for [Bmim]<sub>2</sub>[Asp][Asn] (**I**) and [Bmim]<sub>2</sub>[Glu][Gln] (**II**) systems.
- Table S3** Calculated interaction energies (in kJ mol<sup>-1</sup>) using B3LYP and B3LYP-D3 level of theory for [Bmim]<sub>2</sub>[Asp][Asn] mixed ILs.
- Table S4** Calculated interaction energies (in kJ mol<sup>-1</sup>) using B3LYP and B3LYP-D3 level of theory for [Bmim]<sub>2</sub>[Glu][Gln] mixed ILs.
- Figure S6** Optimized structures of different [Bmim]<sub>2</sub>[Asp][Asn] conformers at B3LYP level of theory with different cation orientations. Values in parentheses represent relative stabilization energies with respect to the lowest energy conformer in kJ mol<sup>-1</sup>.
- Figure S7** Optimized structures of different [Bmim]<sub>2</sub>[Asp][Asn] conformers at B3LYP-D3 level of theory with different cation orientations. Values in parentheses represent relative stabilization energies with respect to the lowest energy conformer in kJ mol<sup>-1</sup>.
- Figure S8** Optimized structures of different [Bmim]<sub>2</sub>[Glu][Gln] conformers at B3LYP level of theory with different cation orientations. Values in parentheses represent relative stabilization energies with respect to the lowest energy conformer in kJ mol<sup>-1</sup>.
- Figure S9** Optimized structures of different [Bmim]<sub>2</sub>[Glu][Gln] conformers at B3LYP-D3 level of theory with different cation orientations. Values in parentheses represent relative stabilization energies with respect to the lowest energy conformer in kJ mol<sup>-1</sup>.
- Figure S10** Color-filled RDG isosurfaces depicting Non-covalent interaction (NCI) regions in (a) [Bmim][Asp] (b) [Bmim][Asn] (c) [MBmim][Glu] and (d) [Bmim][Gln] ion pairs. A plot of reduced density gradient (RDG) on the x-axis versus the sign ( $\lambda_2$ ) $\rho$  values on the Y-axis for the same have also been shown.

**Figure S11** Infrared spectra of (a) [Bmim][Asp] (b) [Bmim][Asn] (c) [MBmim][Glu] and (d) [Bmim][Gln] ion pairs.

**Figure S12** A comparison of selected vibrational frequencies ( $\nu$  = Stretching and  $\delta$  = Bending) in (a) [Bmim]<sub>2</sub>[Asp][Asn] and (b) [Bmim]<sub>2</sub>[Glu][Gln] complexes. See text for details.



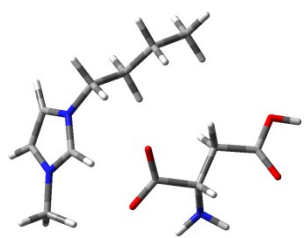

C1 (16.2)

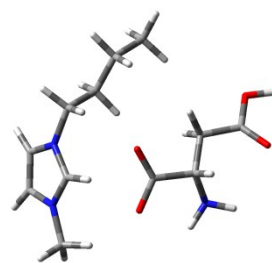

C2 (16.2)

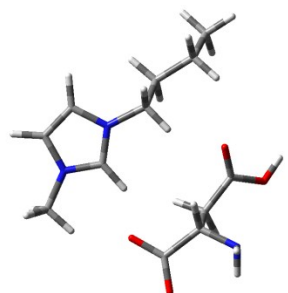

C3 (49.2)

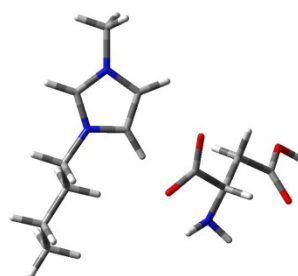

C4 (71.4)

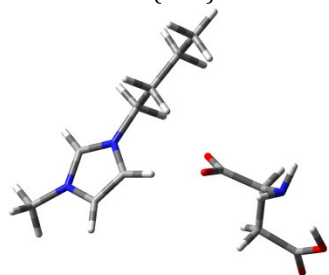

C5 (40.1)

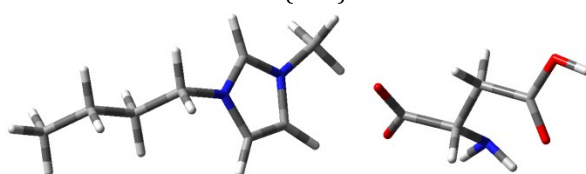

C6 (62.2)

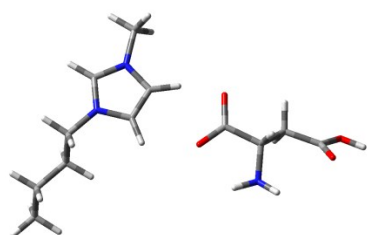

C7 (76.5)

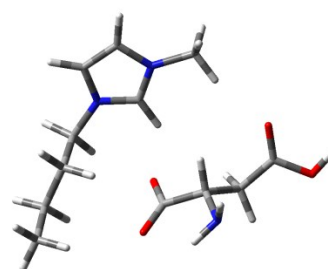

C8 (42.6)

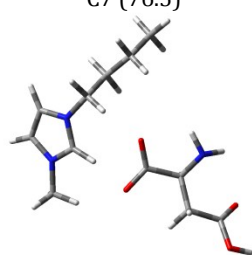

C9 (19.7)

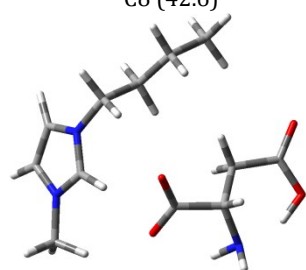

C10 (0.002)

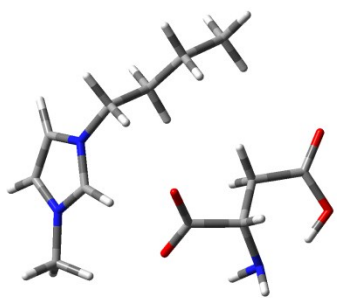

C11 (0.002)

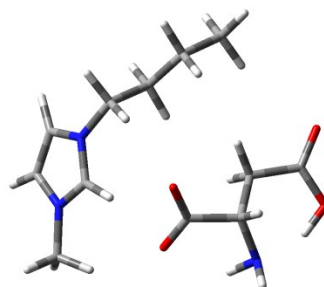

C12 (0.0)

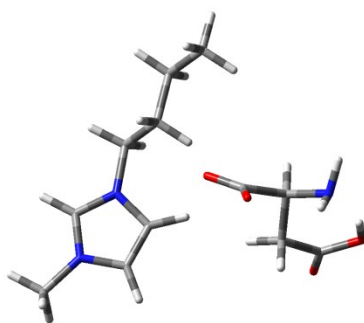

C13 (40.1)

**Figure S1**

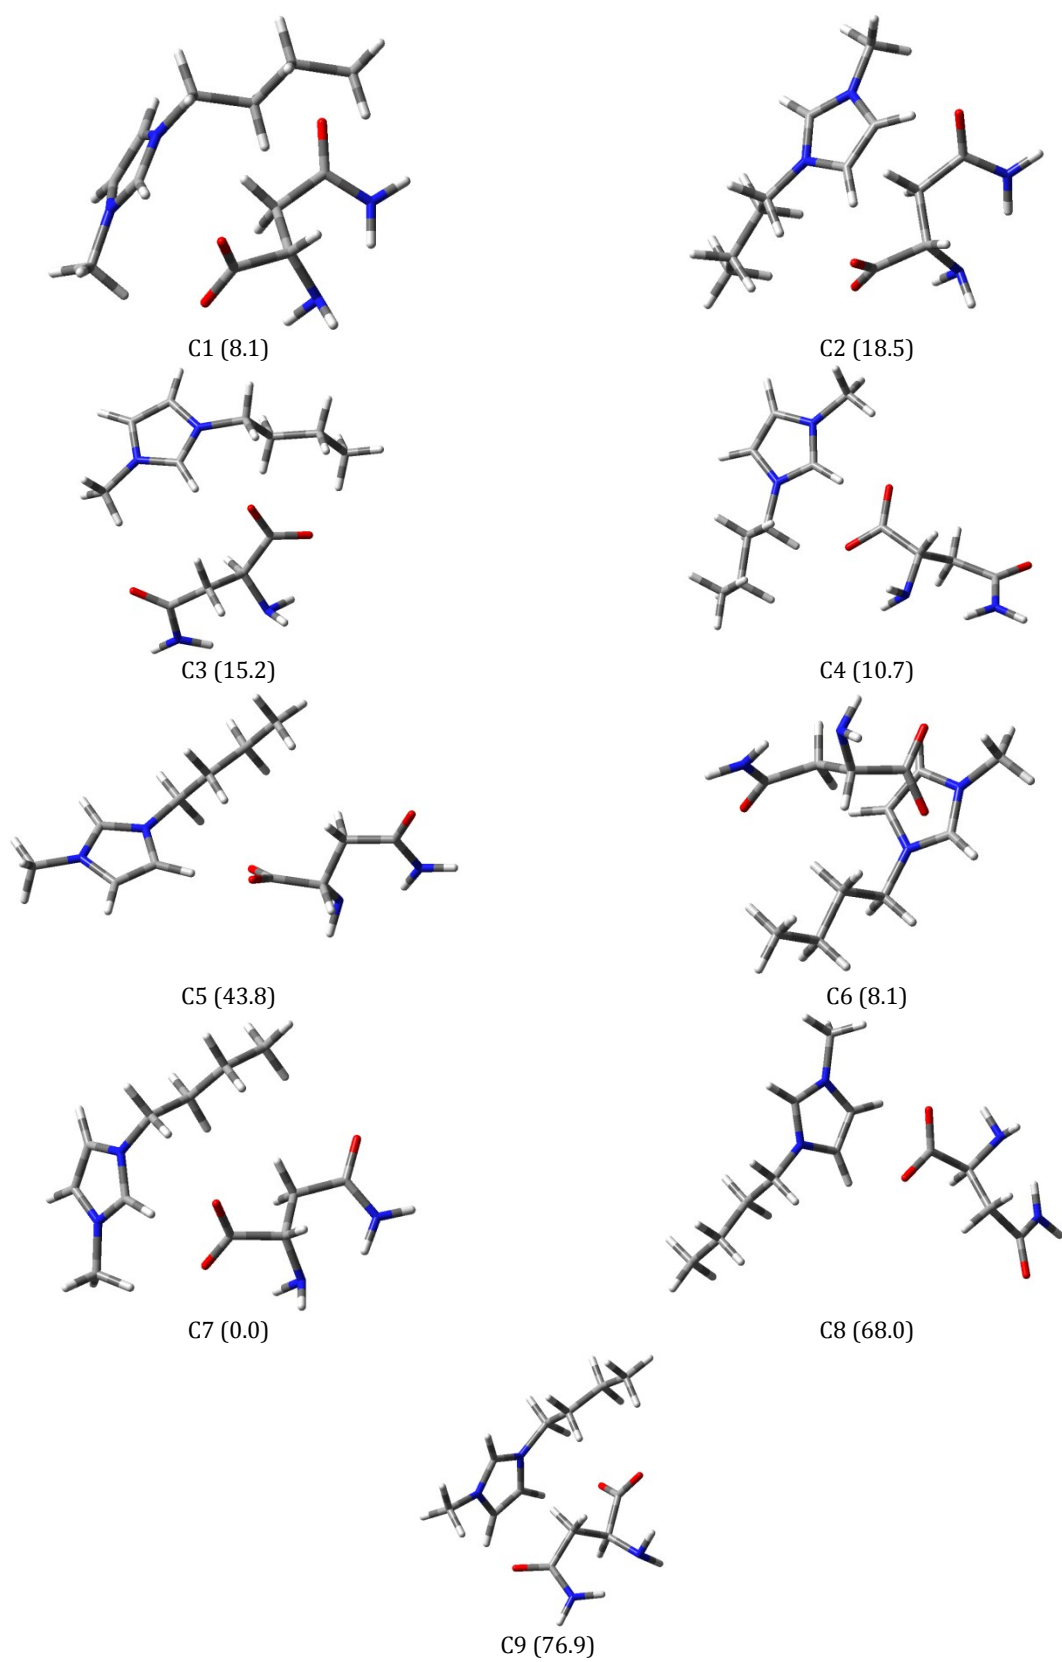

Figure S2

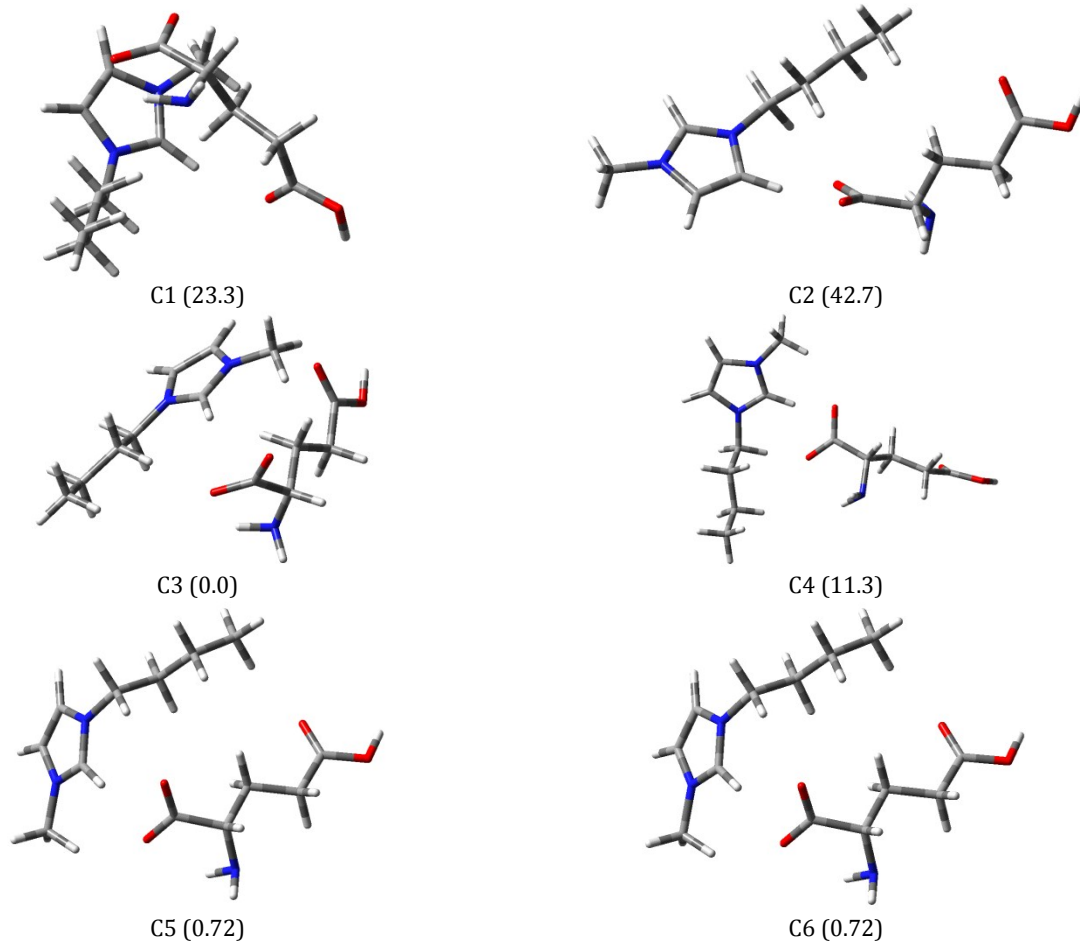

Figure S3

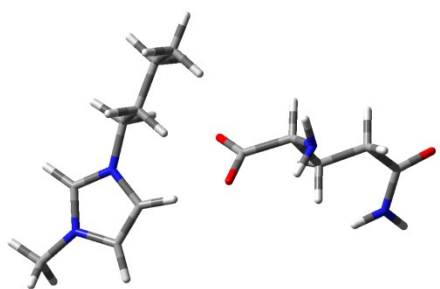

C1 (60.2)

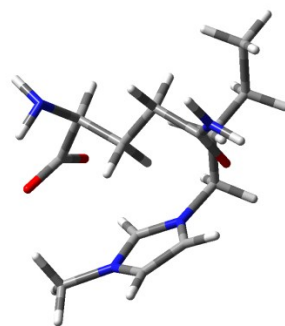

C2 (13.7)

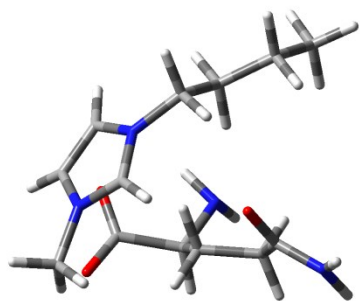

C3 (23.7)

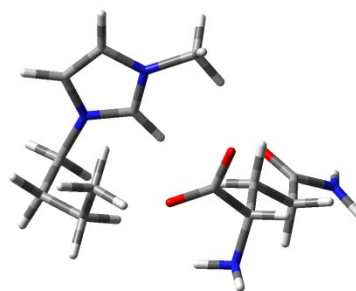

C4 (23.6)

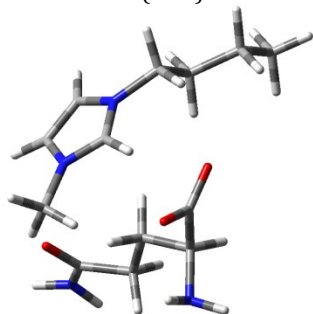

C5 (0.0)

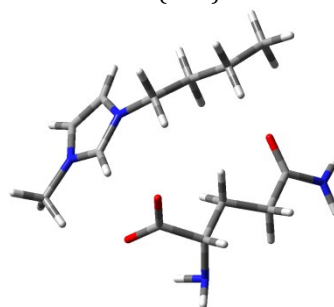

C6 (5.8)

Figure S4



**Table S1**

| [Bmim][Asp] |          |          | [Bmim][Asn] |          |          |
|-------------|----------|----------|-------------|----------|----------|
|             | BE-M05   | BE-D3    |             | BE_M05   | BE_D3    |
| C14         | -419.611 | -427.572 | C7          | -398.342 | -406.344 |
| C10         | -419.611 | -427.572 | C4          | -390.132 | -395.566 |
| C11         | -419.611 | -427.572 | C6          | -388.329 | -398.204 |
| C1          | -403.346 | -410.984 | C1          | -388.328 | -398.203 |
| C2          | -403.345 | -410.983 | C3          | -383.005 | -391.112 |
| C9          | -399.909 | -405.461 | C2          | -378.763 | -387.811 |
| C5          | -379.467 | -384.777 | C9          | -378.762 | -387.81  |
| C13         | -379.467 | -384.777 | C5          | -355.825 | -362.506 |
| C8          | -376.914 | -387.008 | C8          | -335.242 | -338.28  |
| C3          | -370.199 | -377.547 |             |          |          |
| C12         | -365.811 | -369.847 |             |          |          |
| C6          | -357.371 | -405.48  |             |          |          |
| C4          | -348.172 | -365.314 |             |          |          |
| C7          | -343.105 | -346.128 |             |          |          |
| [Bmim][Glu] |          |          | [Bmim][Gln] |          |          |
|             | BE_M05   | BE_D3    |             | BE_M05   | BE_D3    |
| C3          | -411.805 | -420.66  | C5          | -411.767 | -421.448 |
| C6          | -411.689 | -419.936 | C6          | -406.295 | -415.608 |
| C5          | -411.688 | -419.936 | C2          | -396.731 | -407.717 |
| C4          | -403.646 | -409.264 | C4          | -391.29  | -397.77  |
| C1          | -383.434 | -397.623 | C3          | -385.624 | -397.686 |
| C2          | -370.693 | -377.926 | C1          | -354.608 | -360.452 |

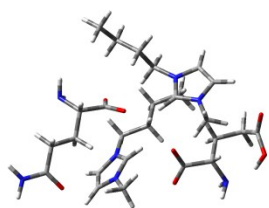

**II\_T\_C4\_fn (0.0)**

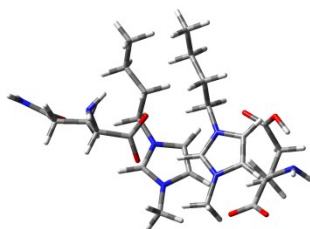

**II\_P\_mf\_C2 (3.30)**

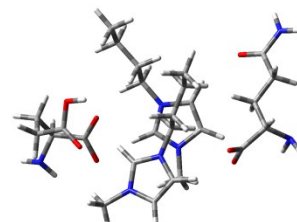

**II\_P\_mn\_C2 (12.67)**

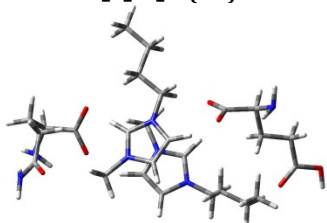

**II\_A\_C21\_nn (13.67)**

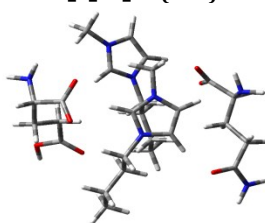

**II\_P\_nn\_C6 (17.76)**

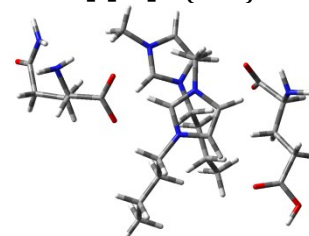

**II\_P\_mm\_C4 (18.55)**

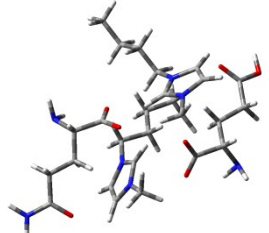

**II\_T\_C5\_ff (18.64)**

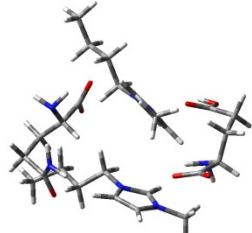

**II\_T\_C2\_fn (19.57)**

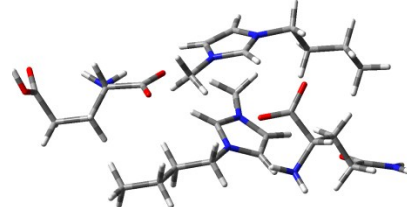

**II\_A\_C7\_mf (20.08)**

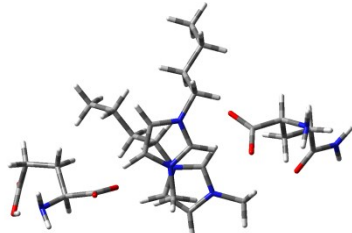

**II\_P\_mm\_C3 (21.68)**

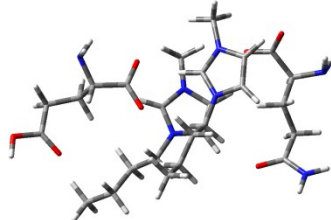

**II\_P\_ff\_C11 (25.00)**

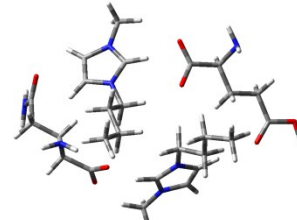

**II\_T\_C1\_ff (25.32)**

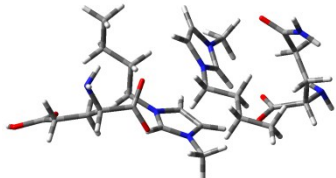

**II\_A\_C1\_mn (25.78)**

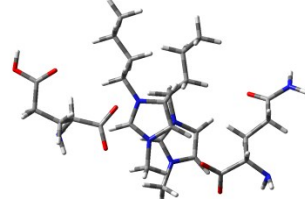

**II\_P\_ff\_C12 (26.45)**

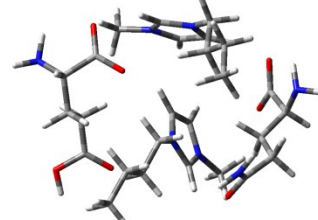

**II\_P\_nn\_C5 (26.74)**

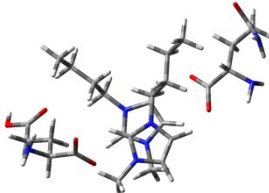

**II\_P\_mf\_C1 (27.12)**

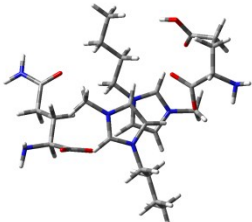

**II\_A\_C16\_fn (27.25)**

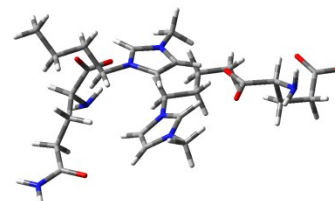

**II\_A\_C10\_ff (28.51)**

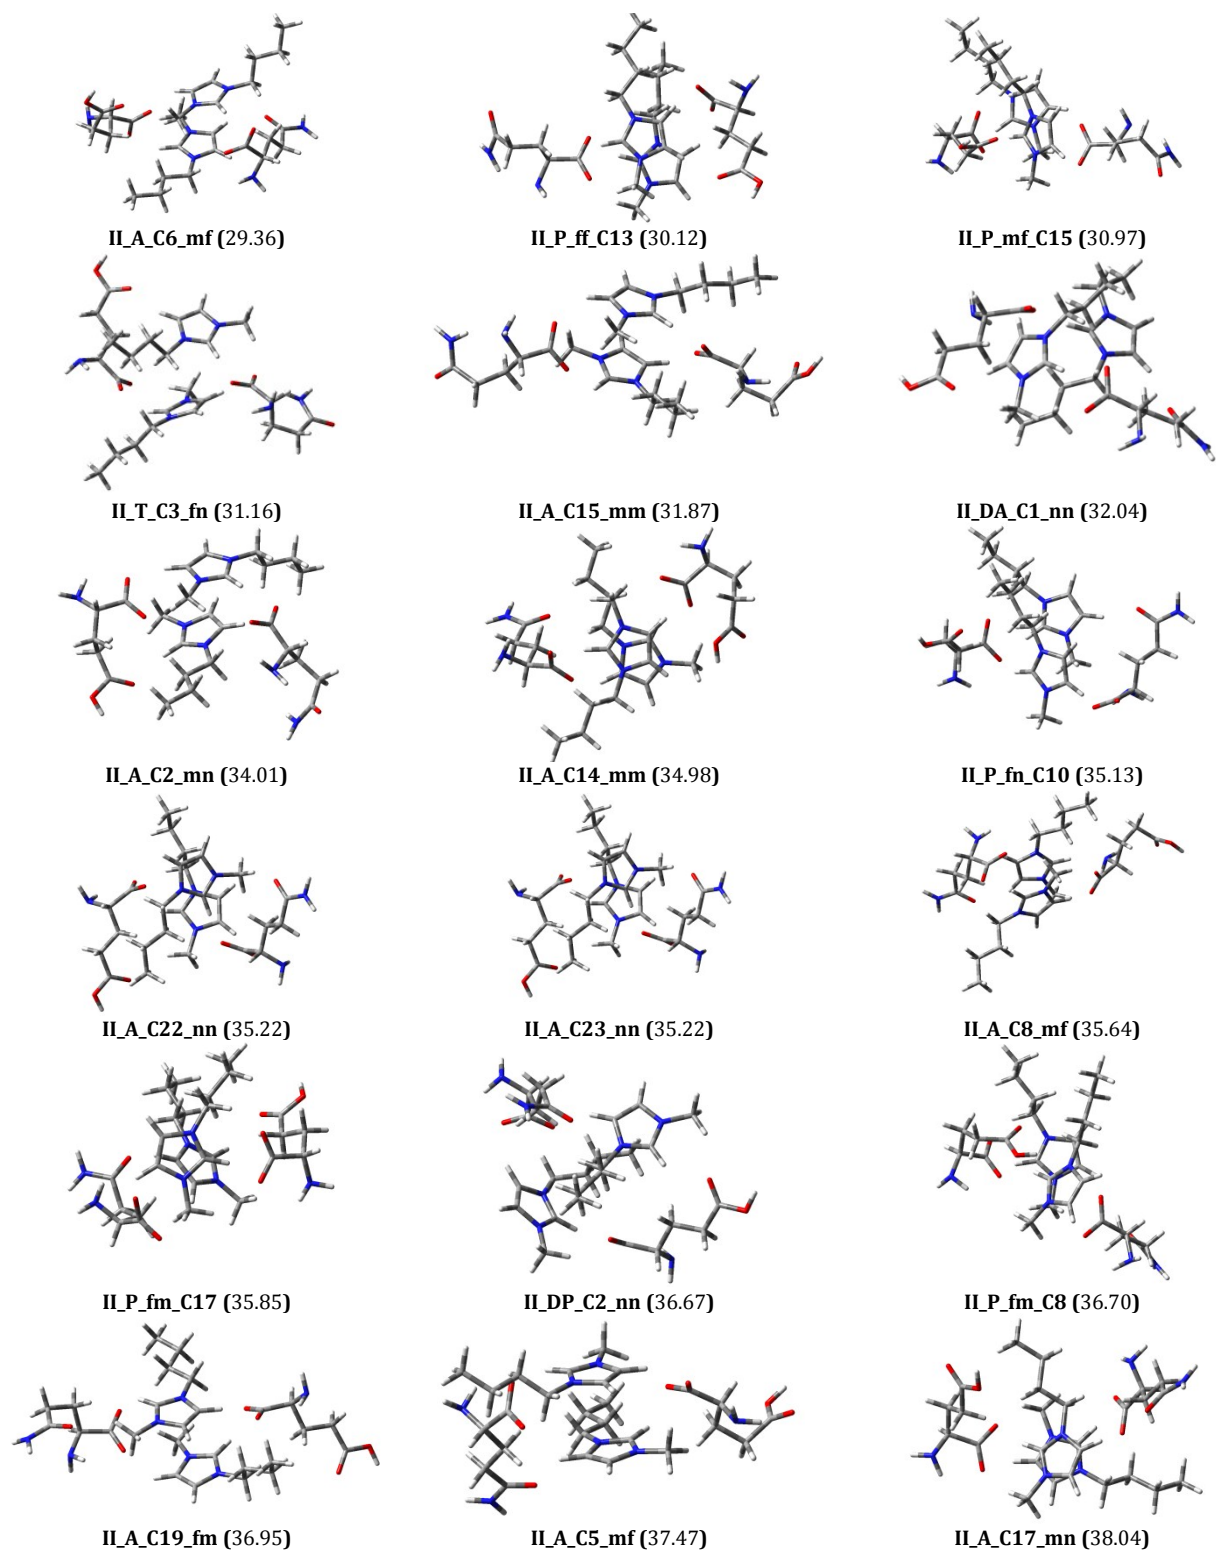

Figure S5 contd.

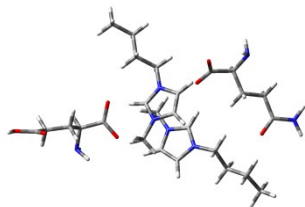

**II\_A\_C13\_mn (38.20)**

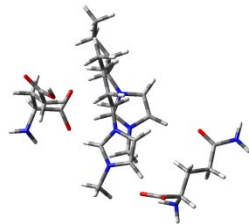

**II\_P\_fm\_C16 (38.41)**

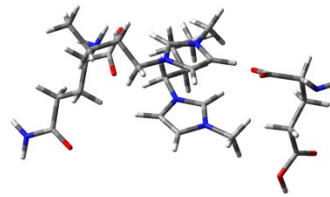

**II\_A\_C18\_mn (40.61)**

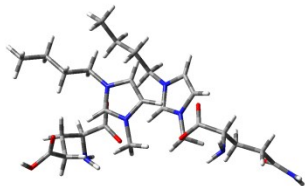

**II\_P\_fm\_C9 (40.66)**

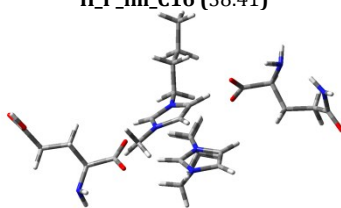

**II\_P\_ff\_C14 (40.85)**

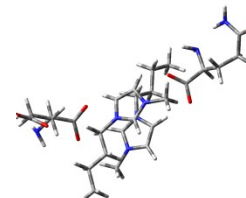

**II\_A\_C12\_ff (42.65)**

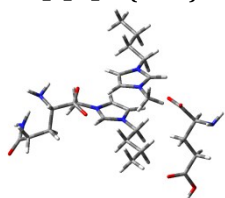

**II\_A\_ff\_C9 (44.62)**

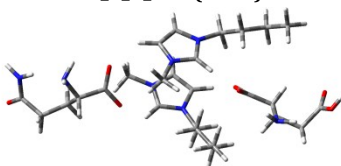

**II\_A\_C3\_mm (46.38)**

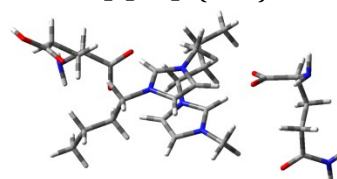

**II\_A\_C20\_mn (48.02)**

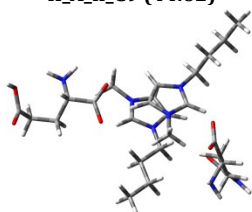

**II\_A\_C4\_mm (55.50)**

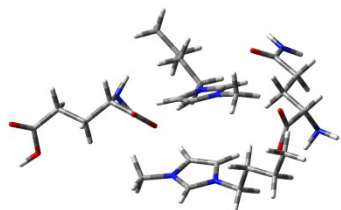

**II\_A\_C11\_ff (64.42)**

**Figure S5**

**Table S2**

| Conformers | R.S.E (kJ mol <sup>-1</sup> ) | Conformers | R.S.E (kJ mol <sup>-1</sup> ) | Conformers  | R.S.E (kJ mol <sup>-1</sup> ) | Conformers  | R.S.E (kJ mol <sup>-1</sup> ) |
|------------|-------------------------------|------------|-------------------------------|-------------|-------------------------------|-------------|-------------------------------|
| I_T_ff_C1  | 0                             | I_P_mf_C7  | 42.9671                       | II_T_C4_fn  | 0.0000                        | II_A_C2_mn  | 36.1321                       |
| I_T_fn_C4  | 7.293639                      | I_A_fn_C16 | 43.10887                      | II_P_mf_C2  | 1.3374                        | II_A_C14_mm | 37.9634                       |
| I_T_ff_C5  | 7.293902                      | I_P_nn_C5  | 43.55311                      | II_P_mn_C2  | 11.5821                       | II_P_fn_C10 | 38.4266                       |
| I_DA_nn_C1 | 8.780722                      | I_T_fn_C3  | 45.1074                       | II_A_C21_nn | 16.8570                       | II_A_C22_nn | 35.7336                       |
| I_DP_nn_C2 | 12.96262                      | I_P_mn_C2  | 50.21164                      | II_P_nn_C6  | 14.3426                       | II_A_C23_nn | 35.7336                       |
| I_P_nn_C6  | 13.97055                      | I_P_fm_C17 | 50.27675                      | II_P_mm_C4  | 20.1670                       | II_A_C8_mf  | 38.7154                       |
| I_P_fm_C15 | 17.16421                      | I_A_mn_C13 | 52.8886                       | II_T_C5_ff  | 17.6357                       | II_P_fm_C17 | 34.2465                       |
| I_A_mn_C18 | 19.61432                      | I_P_mn_C1  | 53.00071                      | II_T_C2_fn  | 25.2476                       | II_DP_C2_nn | 37.5756                       |
| I_A_mn_C17 | 19.81281                      | I_A_mm_C3  | 55.25155                      | II_A_C7_mf  | 21.7801                       | II_P_fm_C8  | 37.8361                       |
| I_A_mn_C2  | 19.8984                       | I_A_ff_C9  | 55.25155                      | II_P_mm_C3  | 24.4429                       | II_A_C19_fm | 36.1576                       |
| I_A_mm_C14 | 24.28614                      | I_A_mf_C5  | 56.5068                       | II_P_ff_C11 | 26.9683                       | II_A_C5_mf  | 42.9148                       |
| I_P_fm_C8  | 26.34742                      | I_A_ff_C10 | 56.50706                      | II_T_C1_ff  | 28.2695                       | II_A_C17_mn | 7.4155                        |
| I_P_fn_C9  | 29.33104                      | I_P_ff_C13 | 57.18208                      | II_A_C1_mn  | 23.7466                       | II_A_C13_mn | 48.4686                       |
| I_P_fm_C16 | 29.3355                       | I_A_mf_C8  | 57.84712                      | II_P_ff_C12 | 28.6306                       | II_P_fm_C16 | 39.8719                       |
| I_P_mm_C4  | 31.33167                      | I_A_mf_C6  | 58.17609                      | II_P_nn_C5  | 22.3464                       | II_A_C18_mn | 46.5139                       |
| I_P_fn_C10 | 38.36512                      | I_P_ff_C11 | 61.34665                      | II_P_mf_C1  | 31.1634                       | II_P_fn_C9  | 46.3272                       |
| I_A_mn_C1  | 38.46305                      | I_P_ff_C14 | 67.07627                      | II_A_C16_fn | 28.9973                       | II_P_ff_C14 | 51.2842                       |
| I_P_mm_C3  | 40.78452                      | I_A_mm_C4  | 70.82155                      | II_A_C10_ff | 33.5213                       | II_A_C12_ff | 45.0685                       |
| I_T_fn_C1  | 42.12037                      | I_P_ff_C12 | 74.65268                      | II_A_C6_mf  | 33.2008                       | II_A_C9_ff  | 48.8094                       |
| I_A_fn_C15 | 42.55909                      | I_A_ff_C11 | 77.15452                      | II_P_ff_C13 | 35.2153                       | II_A_C3_mm  | 52.2306                       |
| I_A_mf_C7  | 42.68013                      | I_A_ff_C12 | 80.07486                      | II_P_mf_C15 | 33.8905                       | II_A_C20_mn | 52.6229                       |
|            |                               |            |                               | II_T_C3_fn  | 37.9217                       | II_A_C4_mm  | 63.5649                       |
|            |                               |            |                               | II_A_C15_mm | 36.1371                       | II_A_C11_ff | 58.7261                       |
|            |                               |            |                               | II_DA_C1_nn | 33.1230                       |             |                               |

Table S3

| Conformers@B3LYP | B3LYP    | Conformers@B3LYP-D3 | B3LYP-D3 |
|------------------|----------|---------------------|----------|
| I_T_fn_C4        | -868.53  | I_A_mn_C1           | -292.86  |
| I_A_mn_C1        | -843.05  | I_T_fn_C5           | -284.32  |
| I_T_fn_C5        | -842.44  | I_DA_nn_C1          | -282.22  |
| I_A_mn_C17       | -841.60  | I_A_mn_C17          | -281.63  |
| I_T_fn_C3        | -838.76  | I_DP_nn_C2          | -280.55  |
| I_DA_nn_C1       | -836.69  | I_T_fn_C4           | -278.69  |
| I_P_mn_C2        | -836.52  | I_P_nn_C6           | -276.59  |
| I_T_ff_C5        | -836.10  | I_T_fn_C1           | -276.18  |
| I_P_fn_C10       | -835.07  | I_P_mn_C2           | -275.83  |
| I_P_fn_C9        | -835.07  | I_A_mn_C2           | -273.46  |
| I_DP_nn_C2       | -831.45  | I_A_fn_C15          | -271.71  |
| I_A_fn_C16       | -831.07  | I_P_fm_C8           | -270.67  |
| I_T_ff_C1        | -830.39  | I_P_mf_C7           | -270.42  |
| I_A_mn_C18       | -824.76  | I_P_fm_C15          | -270.23  |
| I_P_mm_C1        | -824.30  | I_P_fn_C9           | -270.00  |
| I_P_fm_C17       | -823.35  | I_A_fn_C16          | -267.02  |
| I_P_fm_C8        | -822.99  | I_P_fn_C10          | -266.53  |
| I_A_mm_C14       | -822.43  | I_P_mm_C1           | -266.04  |
| I_P_fm_C16       | -820.93  | I_A_mn_C18          | -265.37  |
| I_A_mn_C2        | -820.15  | I_T_ff_C1           | -260.49  |
| I_P_fm_C15       | -818.98  | I_P_mm_C3           | -259.53  |
| I_P_nn_C6        | -818.24  | I_P_fm_C17          | -259.03  |
| I_P_ff_C12       | -817.57  | I_A_mm_C14          | -258.09  |
| I_P_ff_C11       | -816.35  | I_P_ff_C13          | -253.39  |
| I_A_mf_C6        | -815.00  | I_P_fm_C16          | -247.98  |
| I_P_ff_C13       | -814.65  | I_T_fn_C3           | -246.55  |
| I_P_mf_C7        | -813.03  | I_P_ff_C12          | -245.98  |
| I_A_fn_C15       | -810.02  | I_P_ff_C11          | -243.37  |
| I_P_nn_C5        | -807.42  | I_P_nn_C5           | -242.05  |
| I_P_mm_C3        | -804.87  | I_A_mf_C6           | -241.09  |
| I_A_mf_C8        | -804.31  | I_A_mf_C7           | -240.47  |
| I_A_mf_C7        | -802.93  | I_A_mn_C13          | -235.99  |
| I_A_ff_C10       | -801.60  | I_A_mf_C8           | -231.36  |
| I_P_ff_C14       | -800.51  | I_A_ff_C10          | -231.27  |
| I_A_mm_C4        | -794.123 | I_A_mm_C3           | -228.01  |
| I_A_mn_C13       | -794.026 | I_A_ff_C9           | -228.01  |
| I_P_mm_C4        | -792.28  | I_A_mm_C4           | -227.78  |
| I_A_mf_C5        | -790.23  | I_A_mf_C5           | -226.82  |
| I_A_mm_C3        | -786.82  | I_P_mm_C4           | -222.61  |

|                   |         |                   |         |
|-------------------|---------|-------------------|---------|
| <b>I_A_ff_C9</b>  | -786.82 | <b>I_P_ff_C14</b> | -222.25 |
| <b>I_A_ff_C11</b> | -786.66 | <b>I_A_ff_C11</b> | -208.31 |
| <b>I_A_ff_C12</b> | -776.23 | <b>I_A_ff_C12</b> | -202.86 |

**Table S4** Calculated interaction energies (in kJ mol<sup>-1</sup>) using B3LYP and B3LYP-D3 level of theory for [Bmim]<sub>2</sub>[Glu][Gln] mixed ILs.

| Conformers@B3LYP | B3LYP   | Conformers@B3LYP-D3 | B3LYP-D3 |
|------------------|---------|---------------------|----------|
| II_P_mf_C1       | -849.46 | II_A_nn_C21         | -298.13  |
| II_A_nn C21      | -849.41 | II_P_mf_C1          | -282.99  |
| II_P_mm_C3       | -834.86 | II_DA_nn C1         | -279.52  |
| II_A_nn C22      | -829.97 | II_A_mm C15         | -269.32  |
| II_A_nn C23      | -829.97 | II_A_nn C22         | -268.83  |
| II_A_mm C15      | -827.54 | II_A_nn C23         | -268.83  |
| II_A_fm C19      | -820.88 | II_DP_nn C2         | -267.23  |
| II_DP_nn C2      | -820.34 | II_A_fm C19         | -261.31  |
| II_A_mn C20      | -815.77 | II_A_mn C20         | -257.21  |
| II_DA_nn C1      | -815.72 |                     |          |

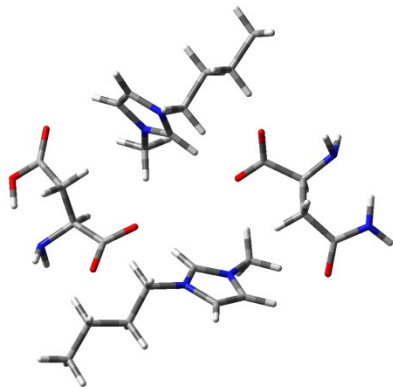

I\_T\_fn\_C4 (0.0)

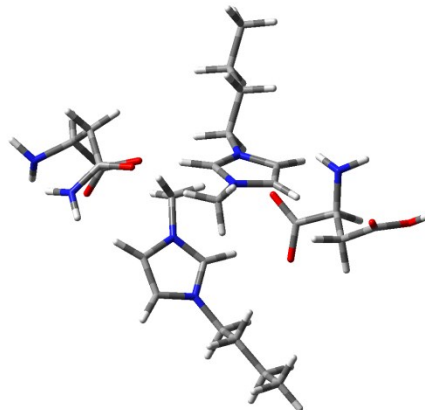

I\_A\_mn\_C1 (25.4)

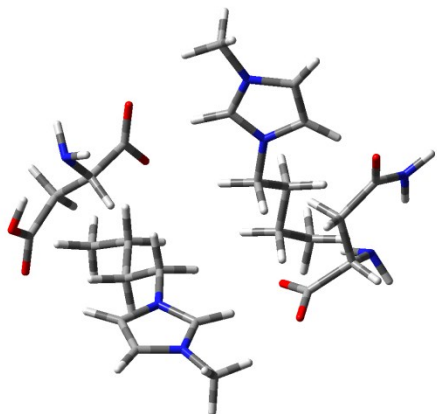

I\_T\_fn\_C1 (26.1)

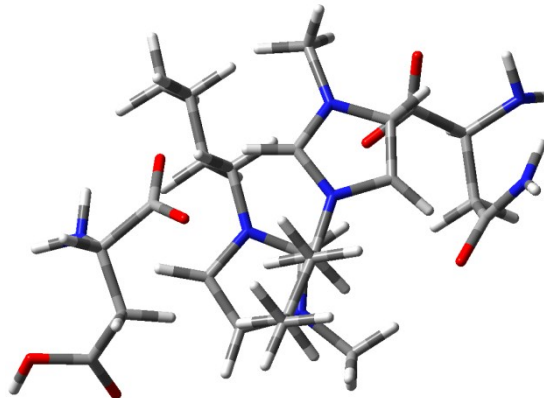

I\_A\_mn\_C17 (26.9)

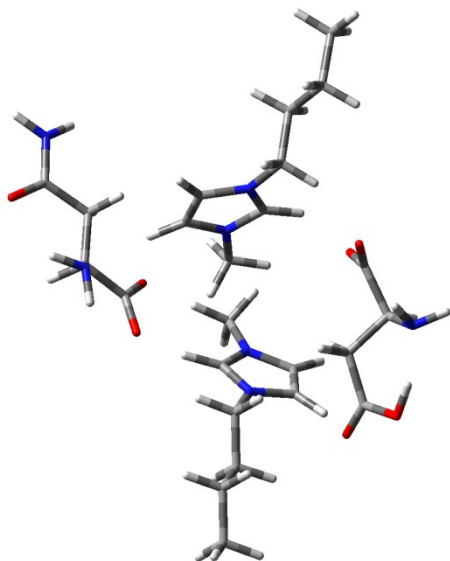

I\_T\_fn\_C3 (29.7)

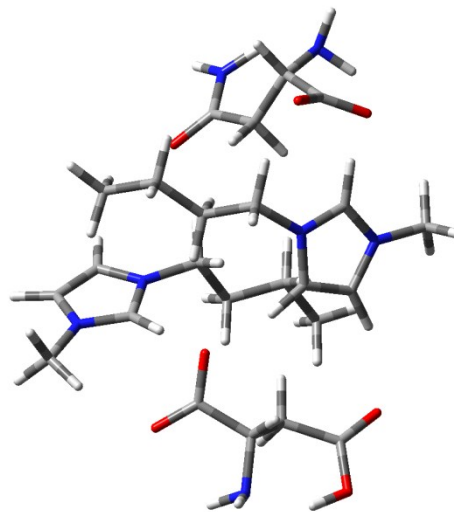

I\_DA\_nn\_C1 (31.8)

Figure S6 contd.



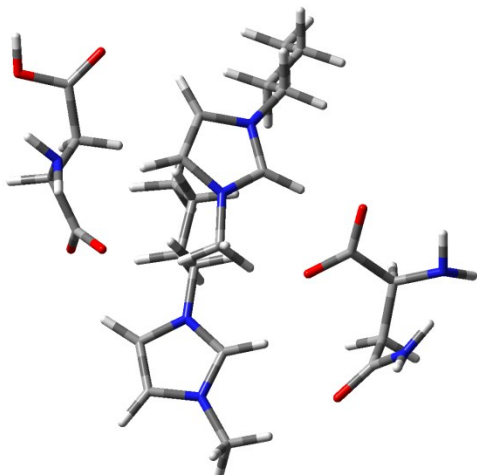

I\_P\_mn\_C2 (32.0)

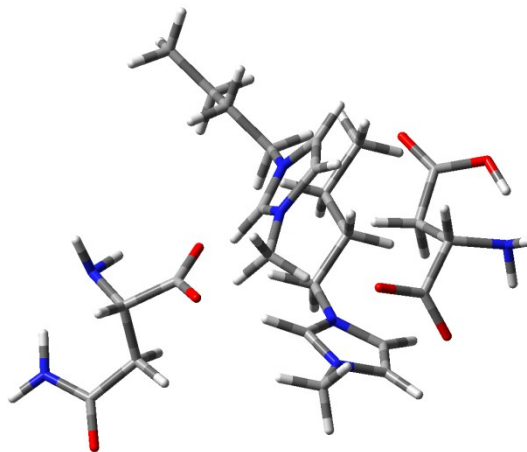

I\_T\_fn\_C5 (32.4)

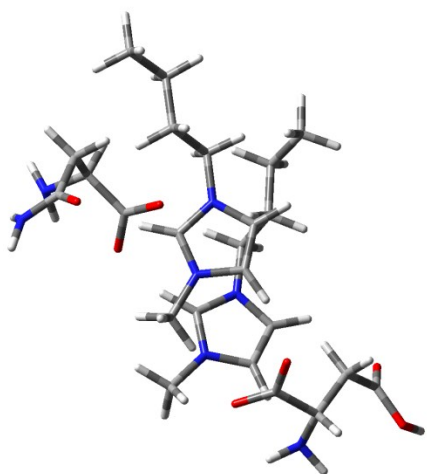

I\_P\_fn\_C10 (33.4)

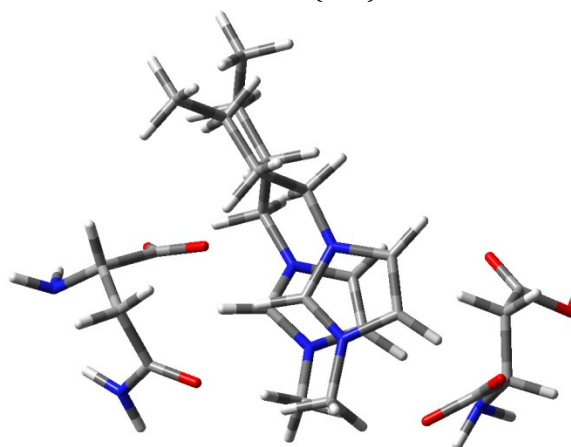

I\_P\_fn\_C9 (33.4)

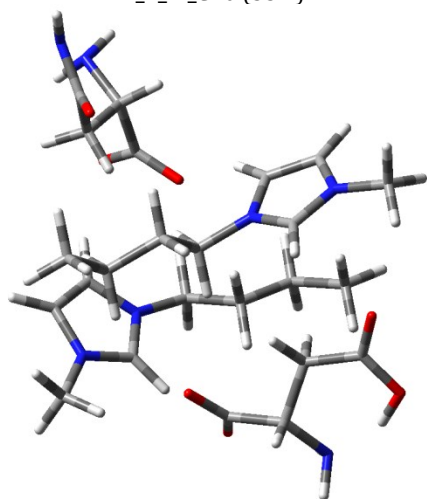

I\_DP\_mn\_C2 (37.08)

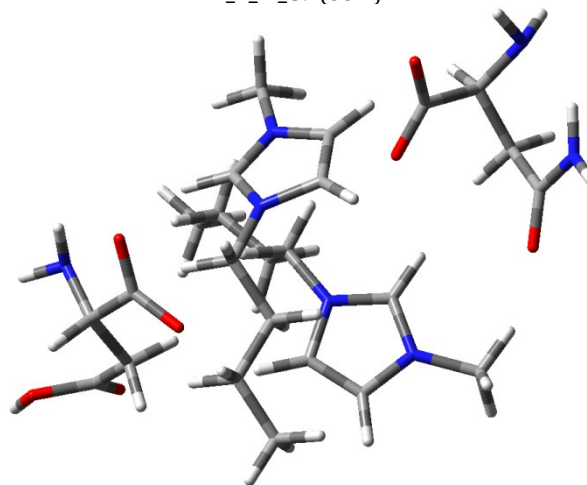

I\_A\_fn\_C16 (37.4)

Figure S6 contd.

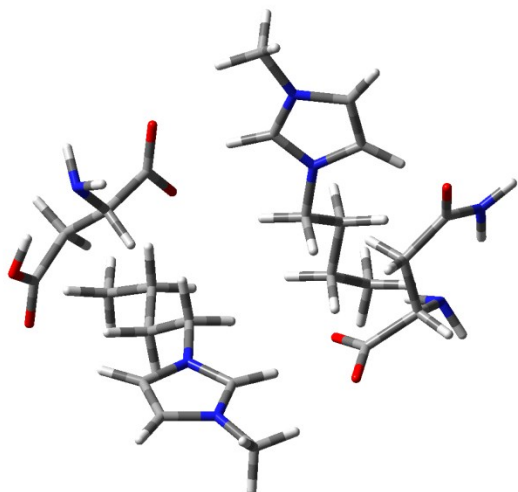

I\_T\_ff\_C1 (38.1)

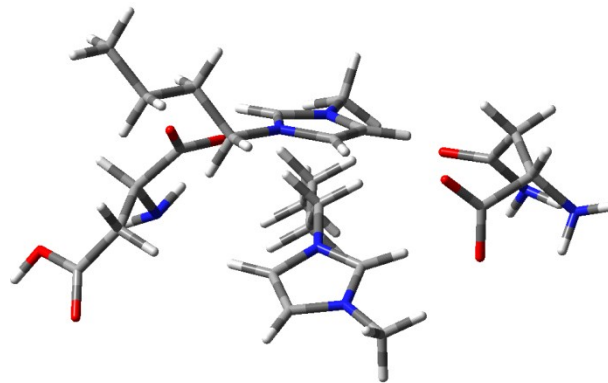

I\_A\_mn\_C18 (43.7)

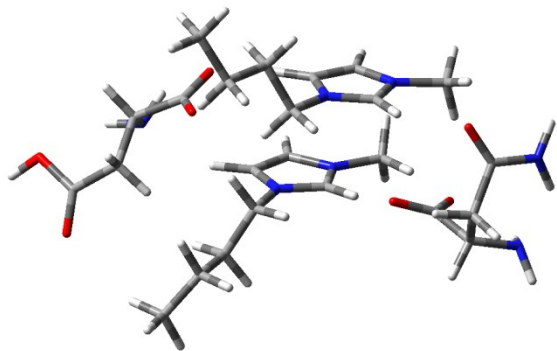

I\_P\_mn\_C1 (44.2)

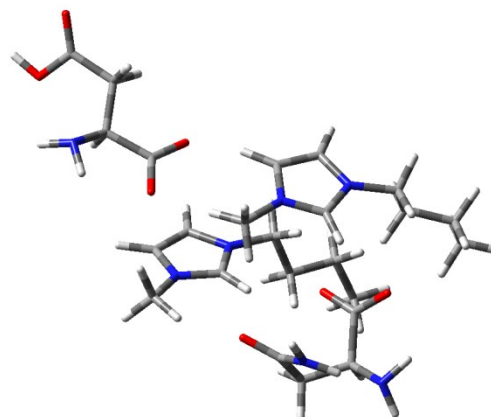

I\_P\_fm\_C17 (45.1)

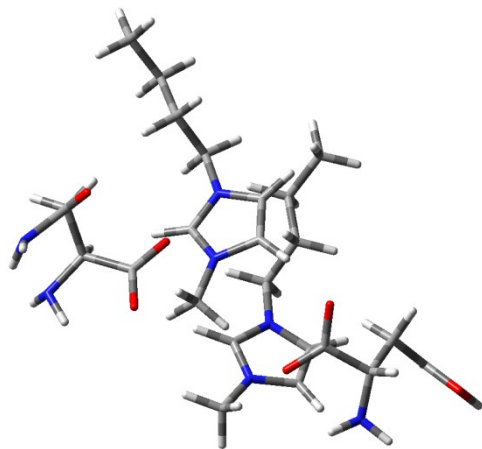

I\_P\_fm\_C8 (45.5)

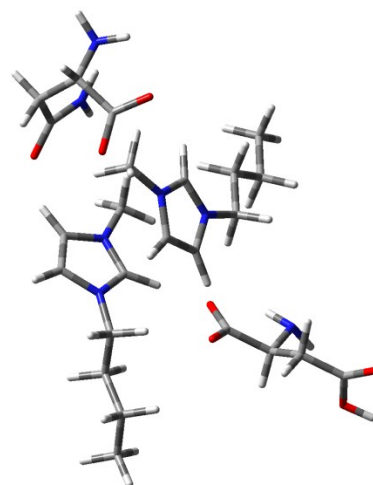

I\_A\_mm\_C14 (46.0)

Figure S6 contd.

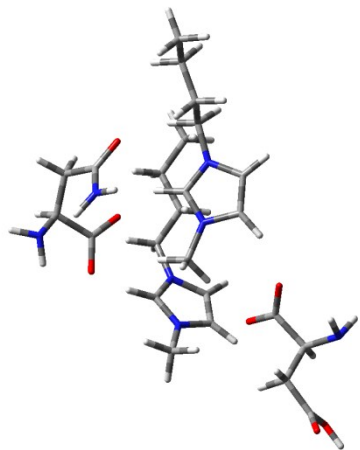

I\_P\_fm\_C16 (47.6)

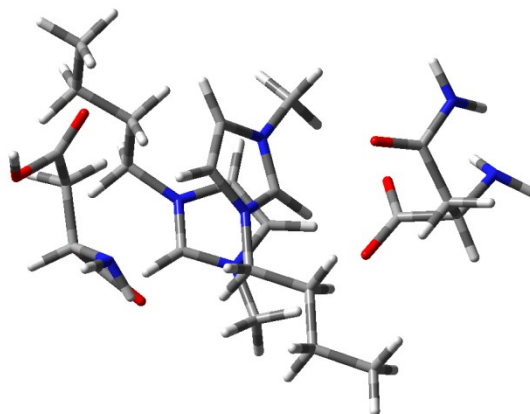

I\_A\_mn\_C2 (48.3)

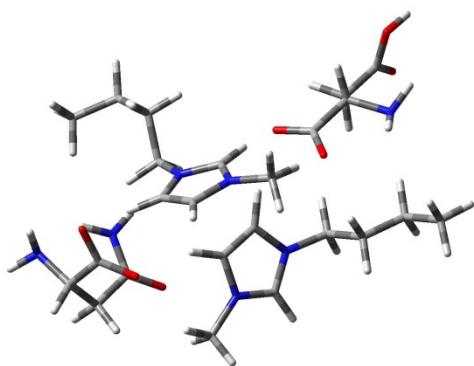

I\_P\_fm\_C15 (49.5)

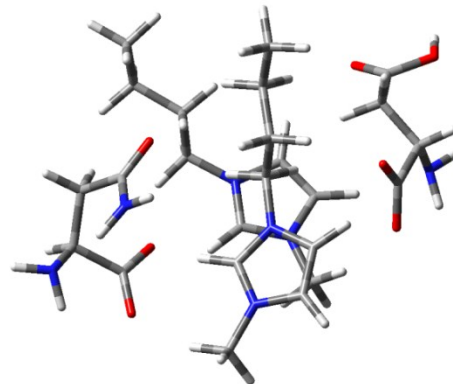

I\_P\_nn\_C6 (50.2)

**Figure S6**

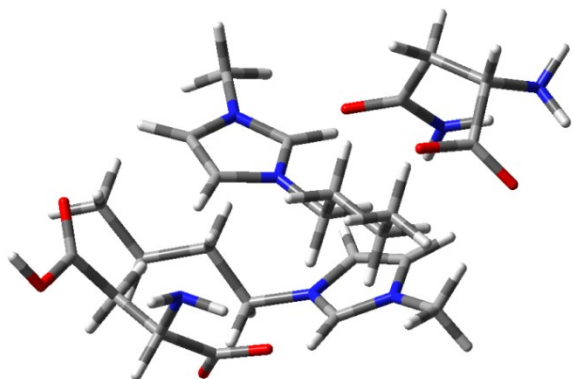

I\_A\_mn\_C1 (0.0)

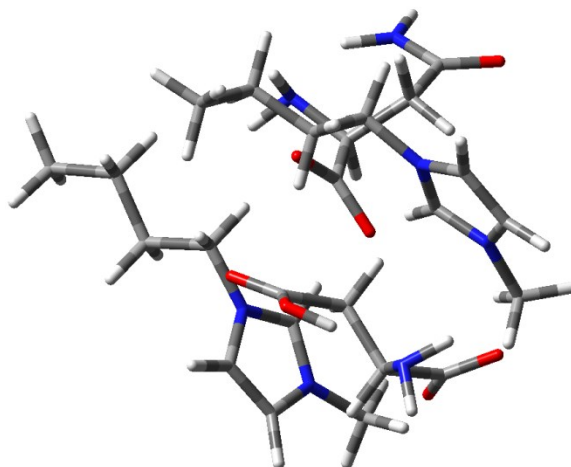

I\_T\_fn\_C5 (8.5)

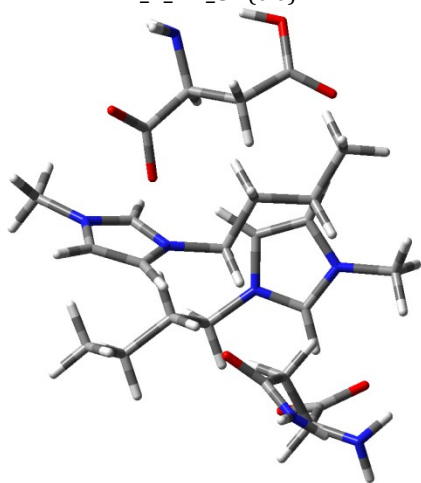

I\_DA\_nn\_C1 (10.6)

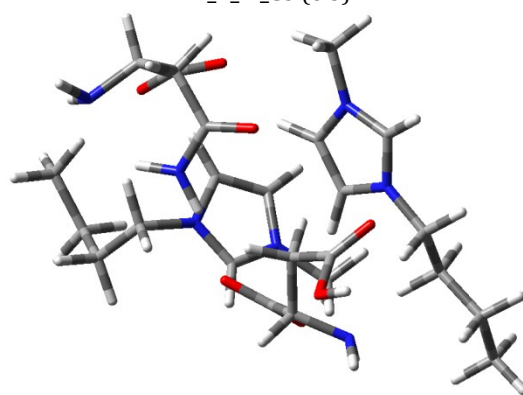

I\_A\_mn\_C17 (11.2)

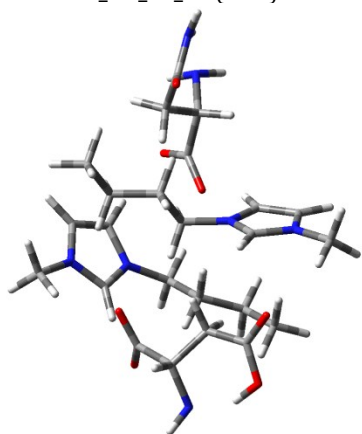

I\_DP\_nn\_C2 (12.3)

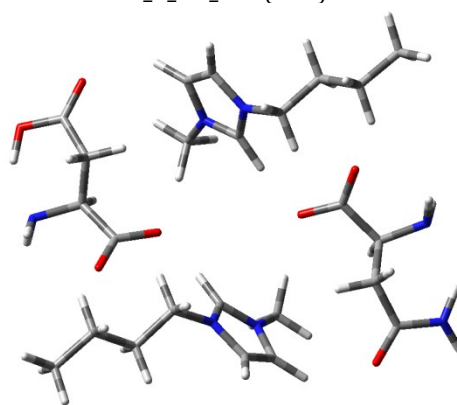

I\_T\_fn\_C4 (14.1)

Figure S7 contd.

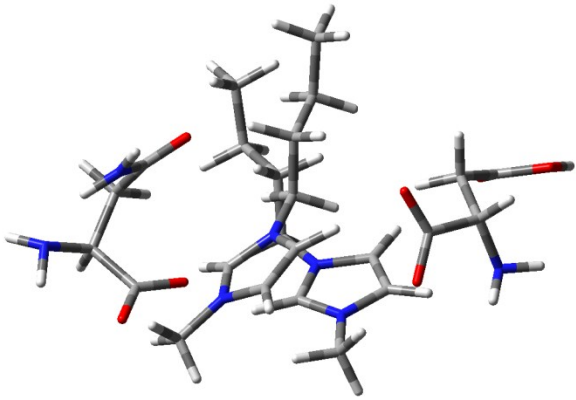

I\_P\_mn\_C6 (16.2)

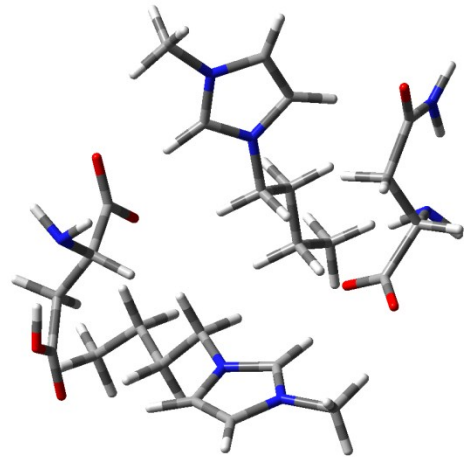

I\_T\_fn\_C1 (16.6)

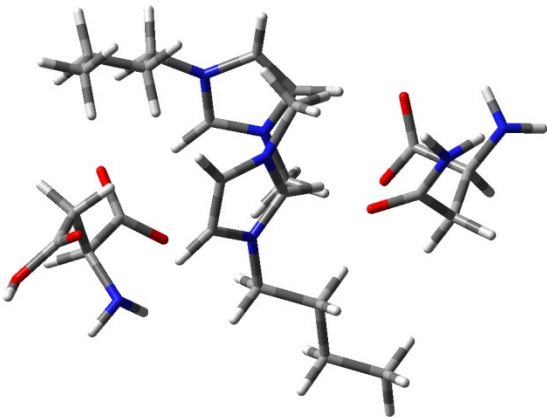

I\_P\_mn\_C2 (17.0)

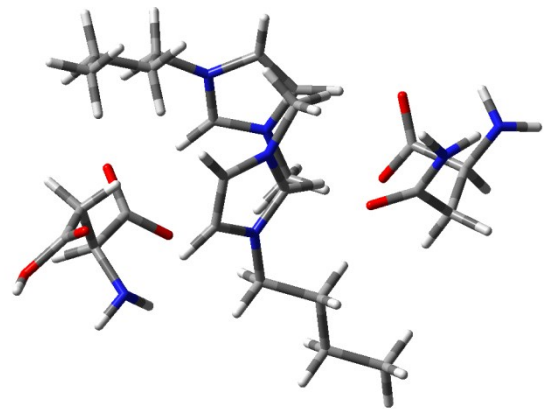

I\_A\_mn\_C2 (19.4)

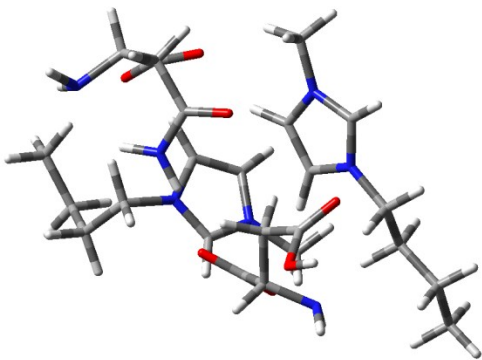

I\_A\_fn\_C15 (21.1)

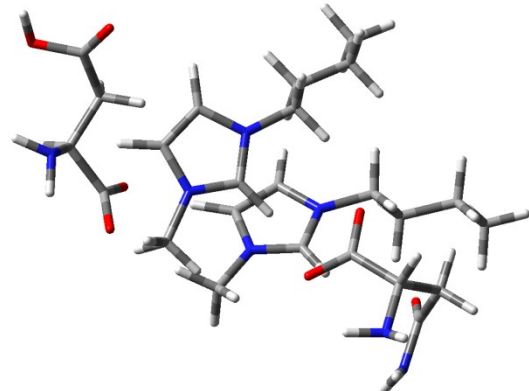

I\_P\_fm\_C8 (22.1)

Figure S7 contd.

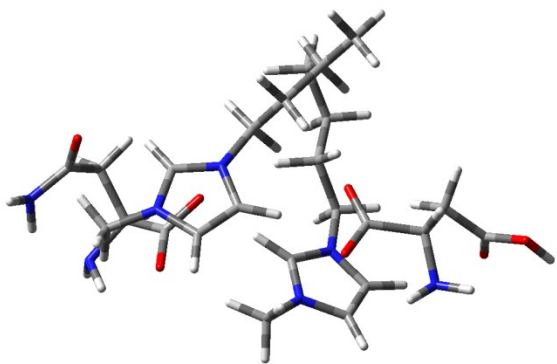

I\_P\_mf\_C7 (22.4)

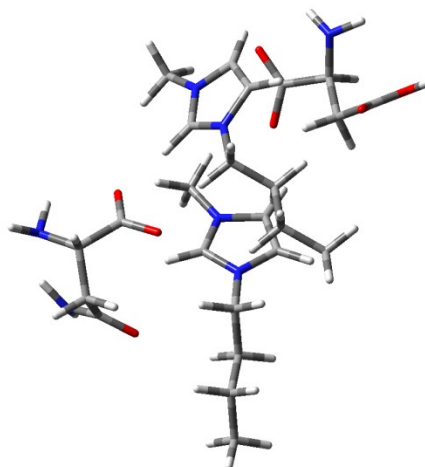

I\_P\_fm\_C15 (22.6)

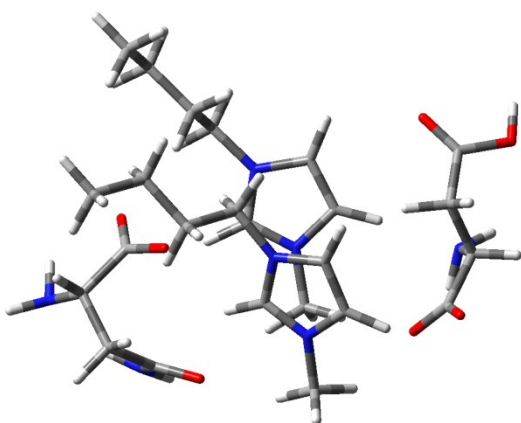

I\_P\_fn\_C9 (22.8)

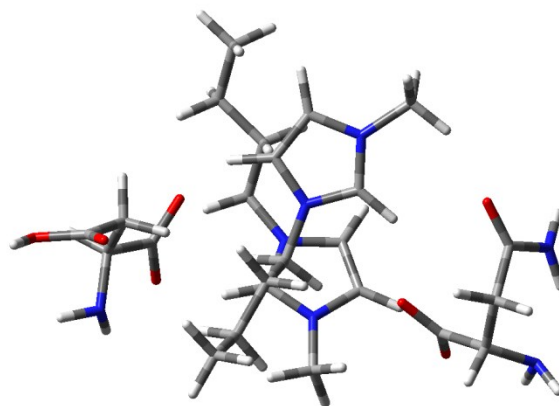

I\_A\_fn\_C16 (25.8)

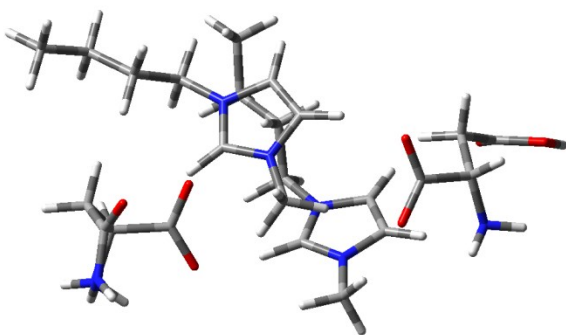

I\_P\_fn\_C10 (26.3)

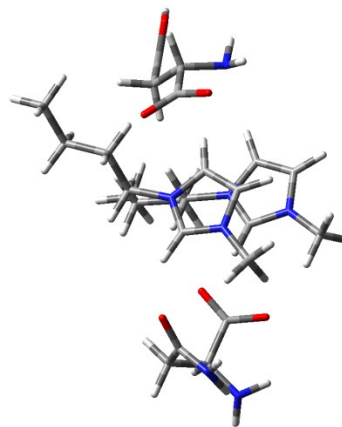

I\_P\_mn\_C1 (26.8)

Figure S7 contd.



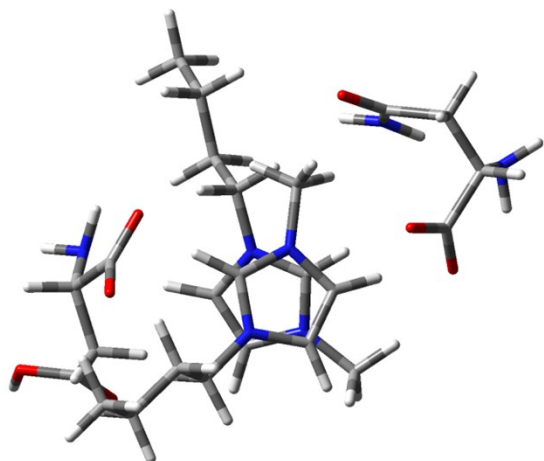

I\_A\_mn\_C18 (27.4)

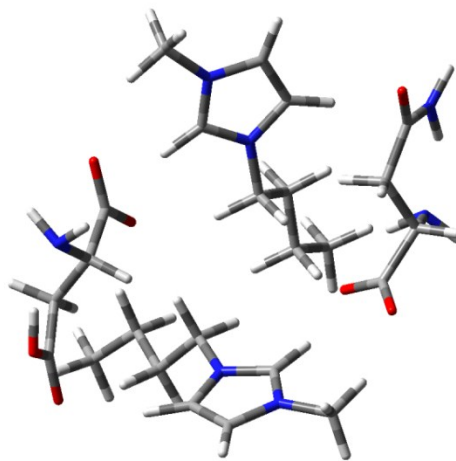

I\_T\_ff\_C1 (32.3)

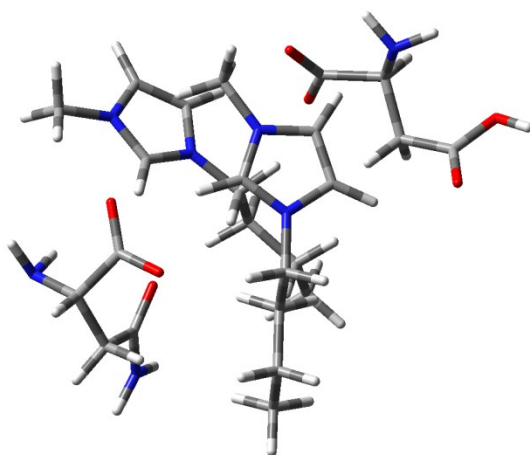

I\_P\_mm\_C3 (33.3)

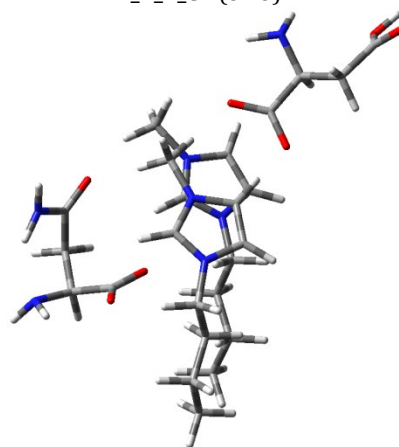

I\_P\_fm\_C17 (33.8)

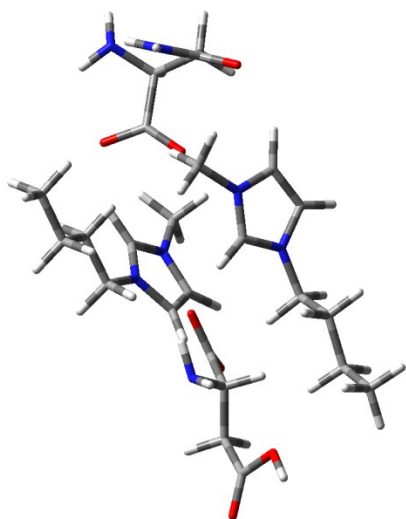

I\_A\_mm\_C14 (34.7)

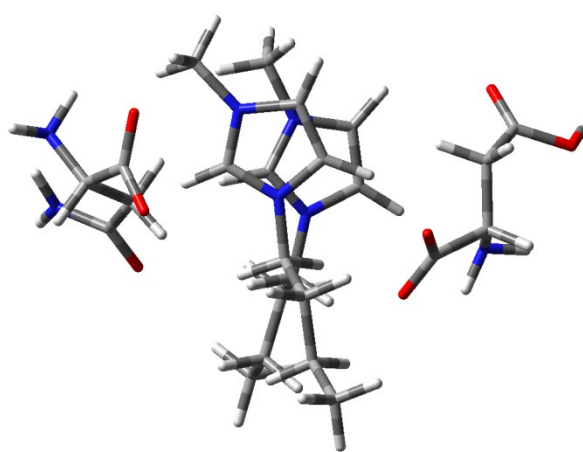

I\_P\_ff\_C13 (39.4)

Figure S7 contd.

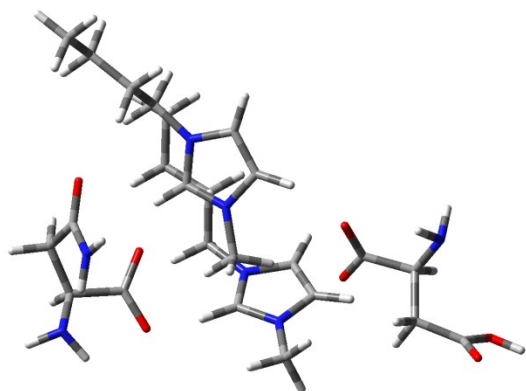

I\_P\_fm\_C16 (44.8)

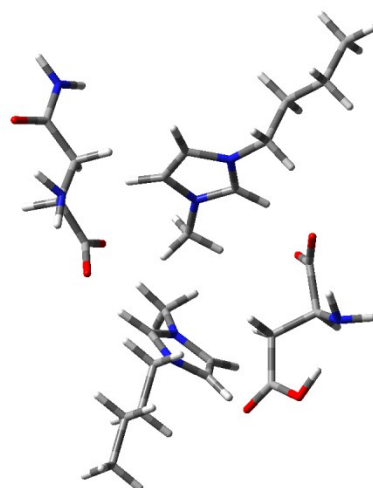

I\_T\_fm\_C3 (46.3)

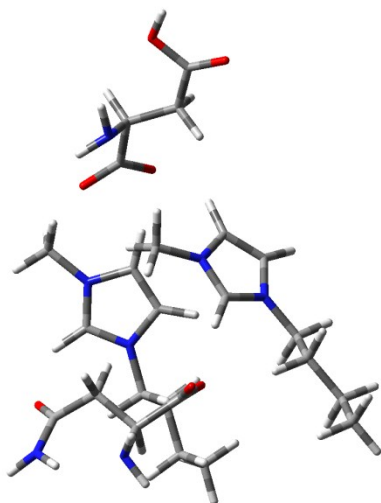

I\_P\_ff\_C12 (46.8)

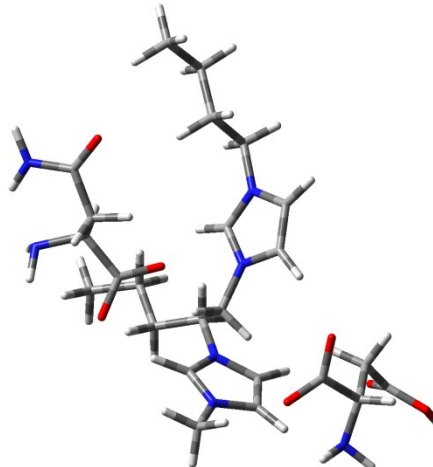

I\_P\_ff\_C11 (49.4)

Figure S7



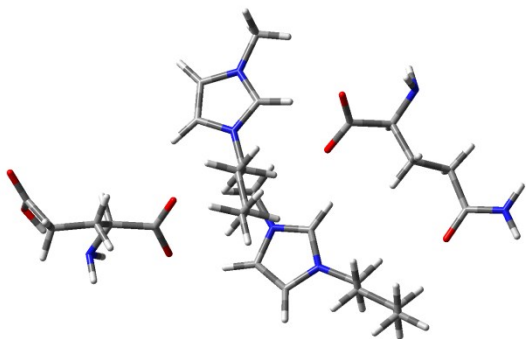

II\_P\_mf\_C1 (0.0)

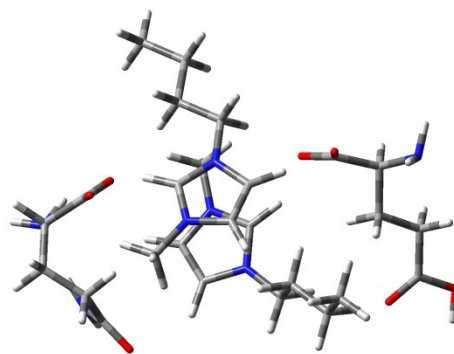

II\_A\_nn\_C21(0.05)

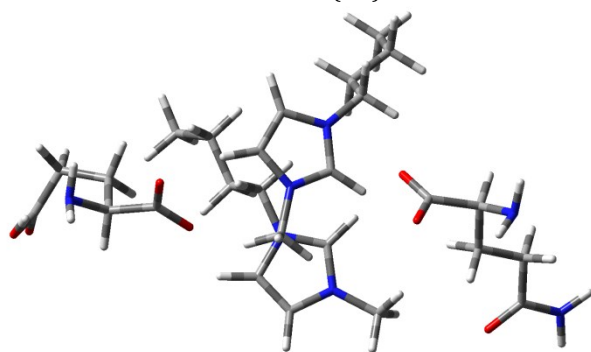

II\_P\_mm\_C3 (14.6)

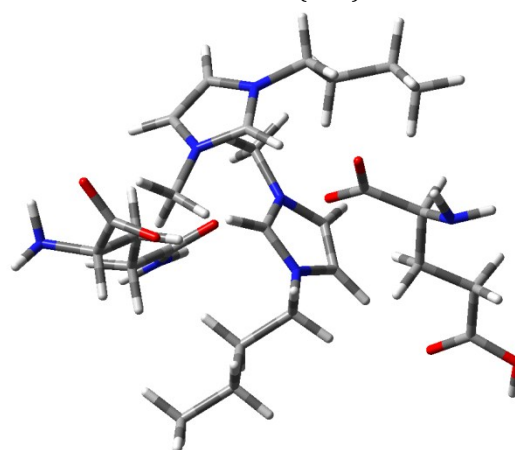

II\_A\_nn\_C22 (19.4)

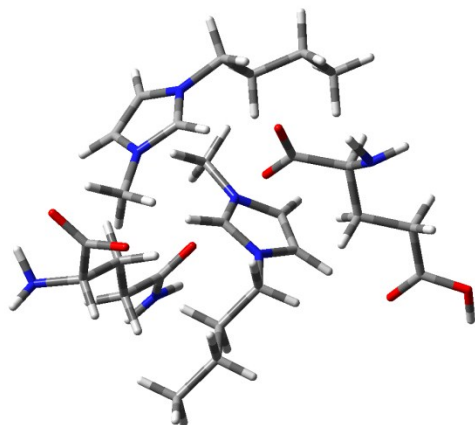

II\_A\_nn\_C23 (19.4)

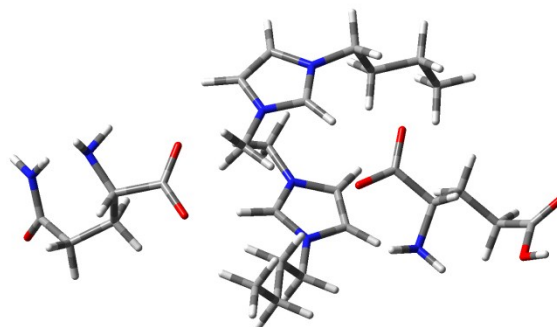

II\_A\_mm\_C15 (21.9)

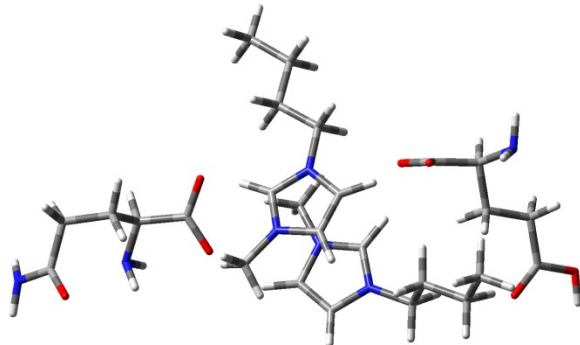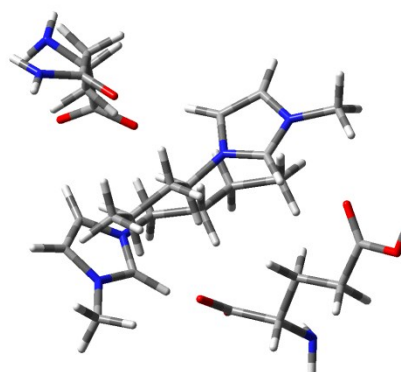

II\_A\_fm\_C19 (28.5)

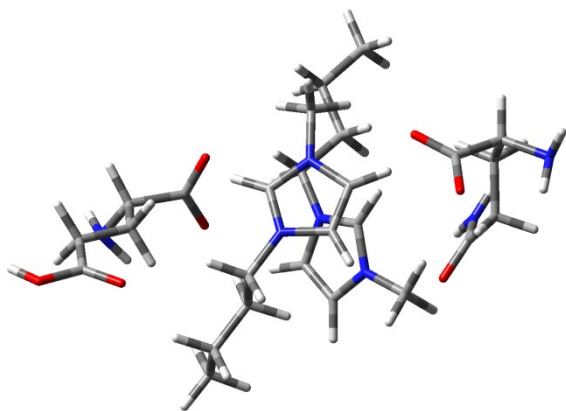

II\_DP\_nn\_C2 (29.11)

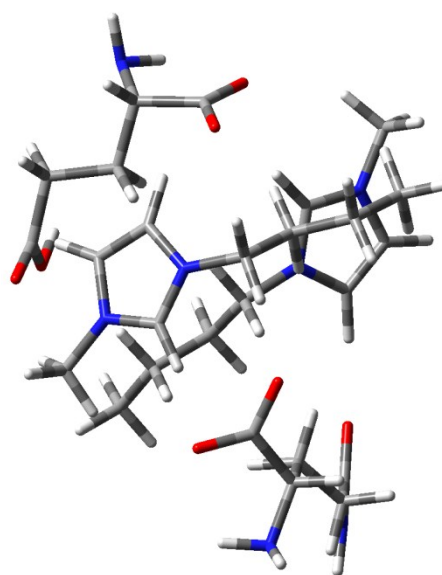

II\_A\_mn\_C20 (33.6)

II\_DA\_nn\_C1 (33.7)

**Figure S8**

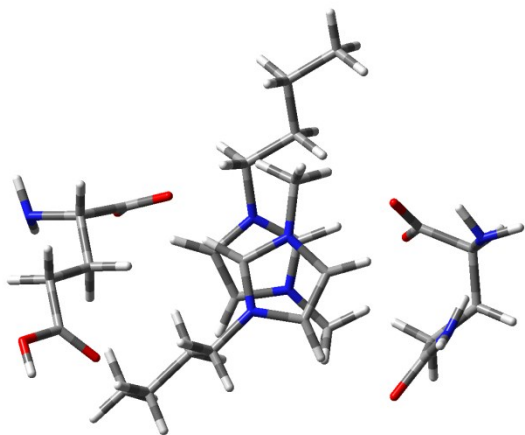

II\_A\_nn\_C21 (0.0)

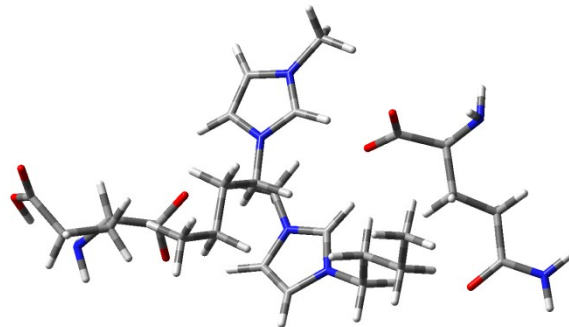

II\_P\_mf\_C1 (15.13)

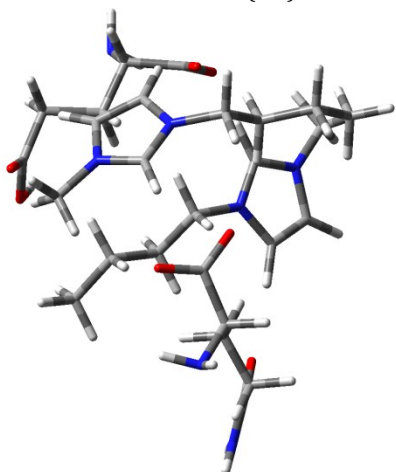

II\_DA\_nn\_C1 (18.6)

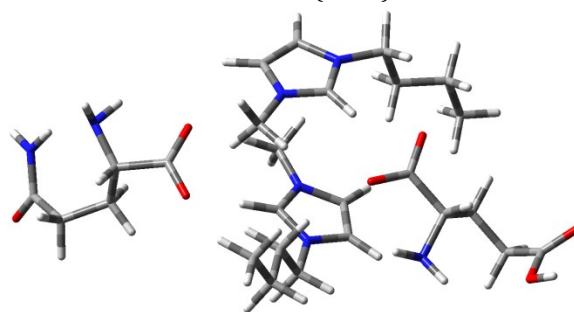

II\_A\_mm\_C15 (28.8)

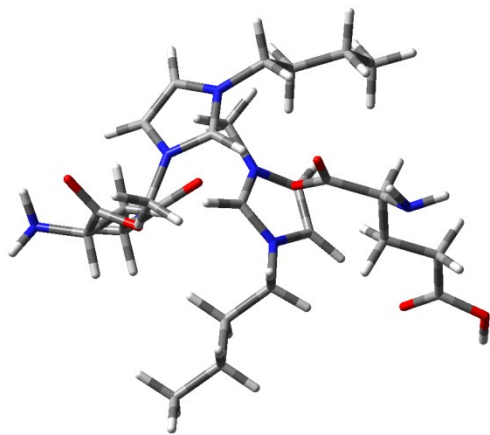

II\_A\_nn\_C22 (29.29)

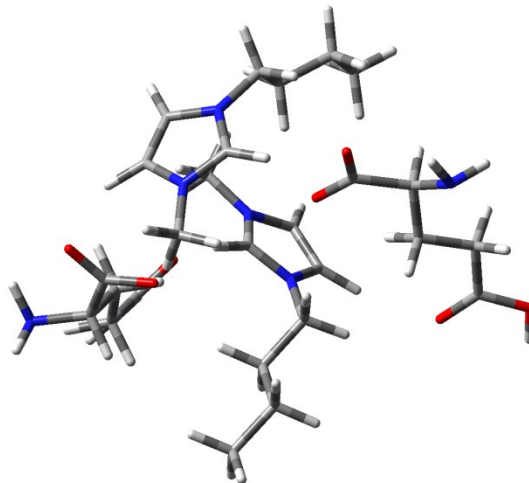

II\_A\_nn\_C23 (29.29)

Figure S9 contd.

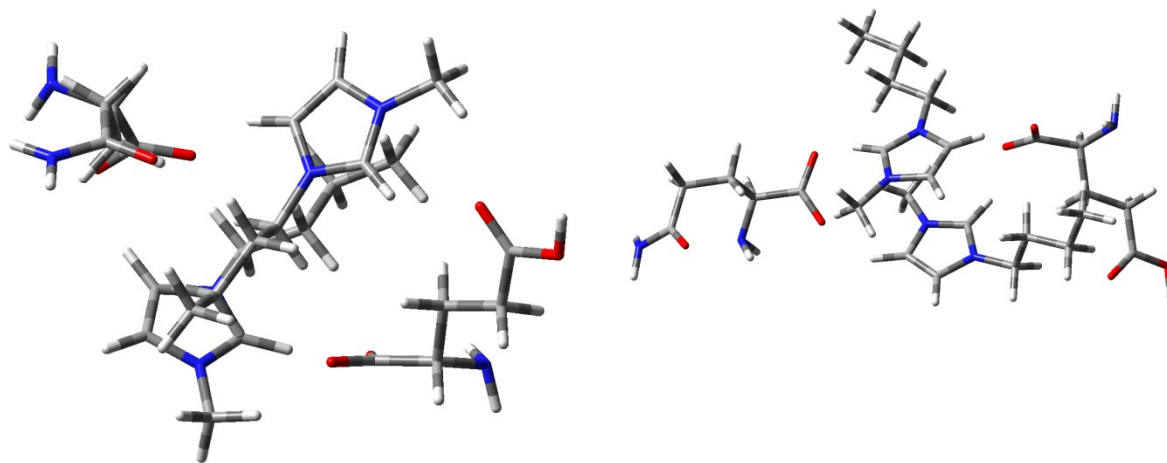

II\_DP\_nn\_C2 (30.8)

II\_A\_fm\_C19 (36.8)

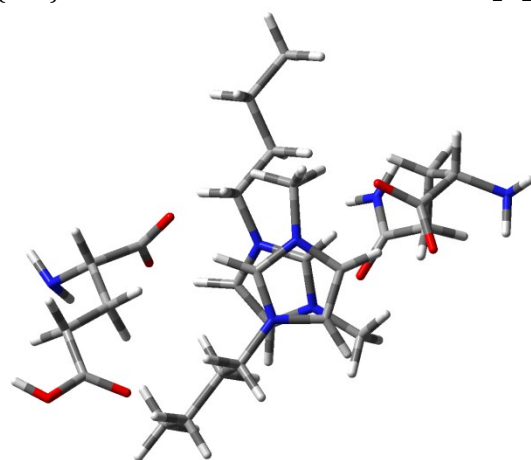

II\_A\_mn\_C20 (40.92)

Figure S9

(a)

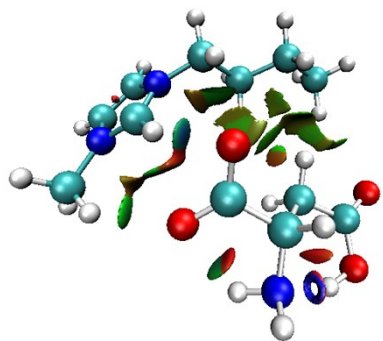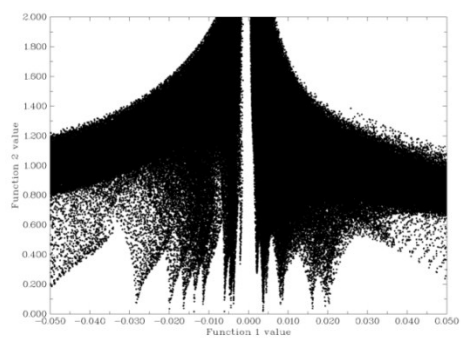

(b)

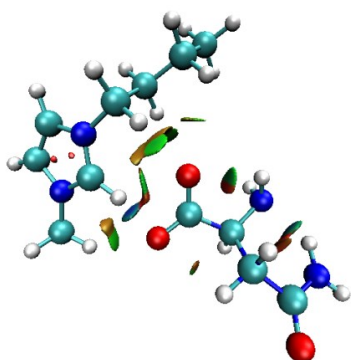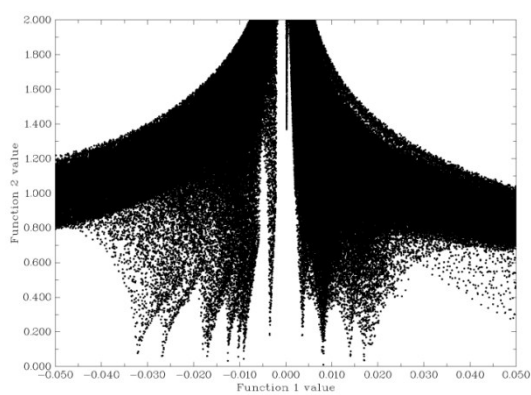

(c)

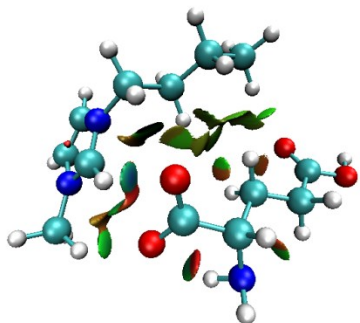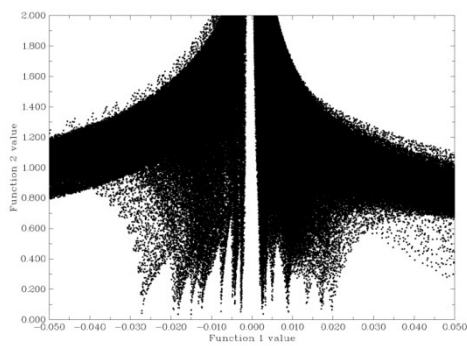

(d)

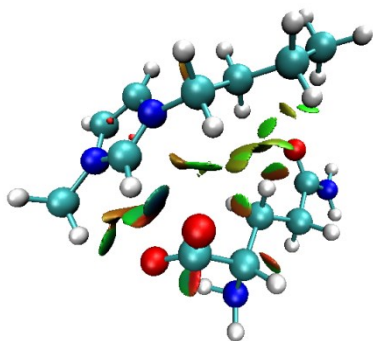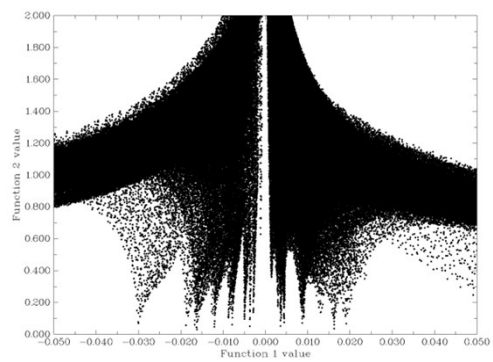

Figure S10

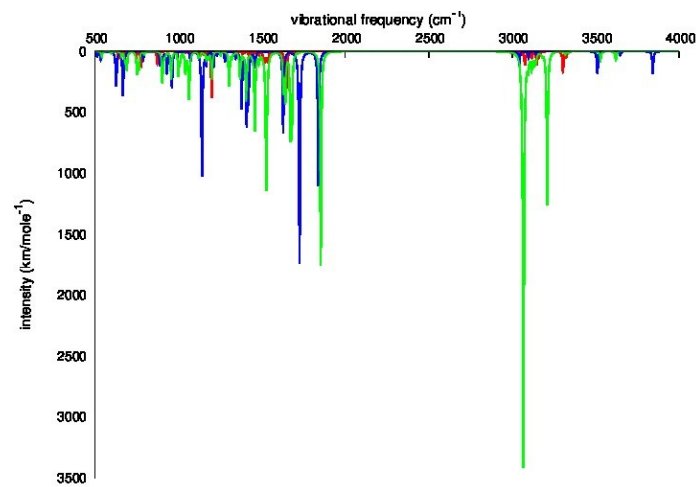

(a) [Bmim][Asp]

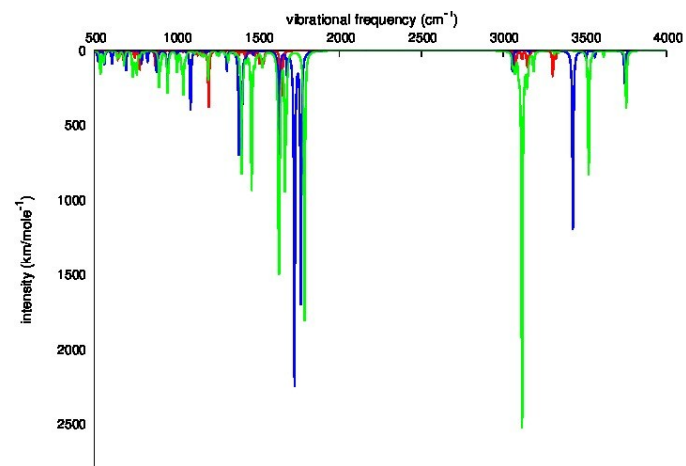

(b) [Bmim][Asn]

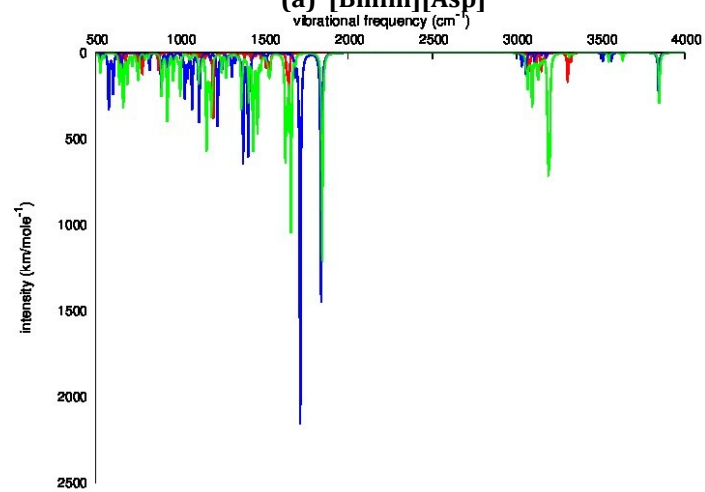

(a) [Bmim][Glu]

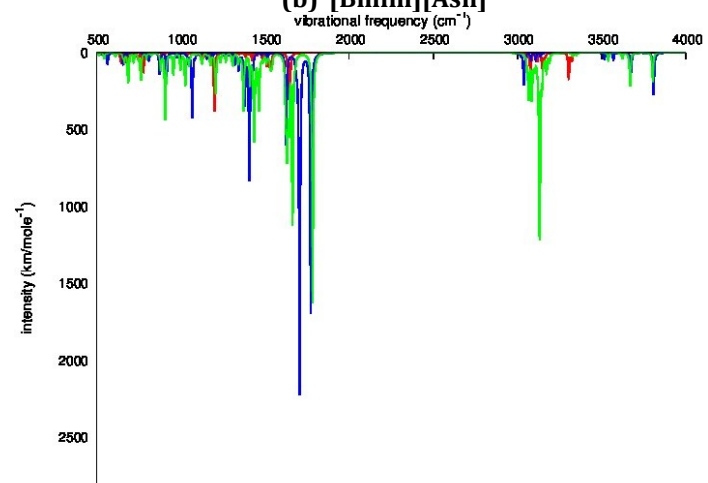

(b) [Bmim][Gln]

— Cation  
— Anion  
— Ion pair

Figure S11

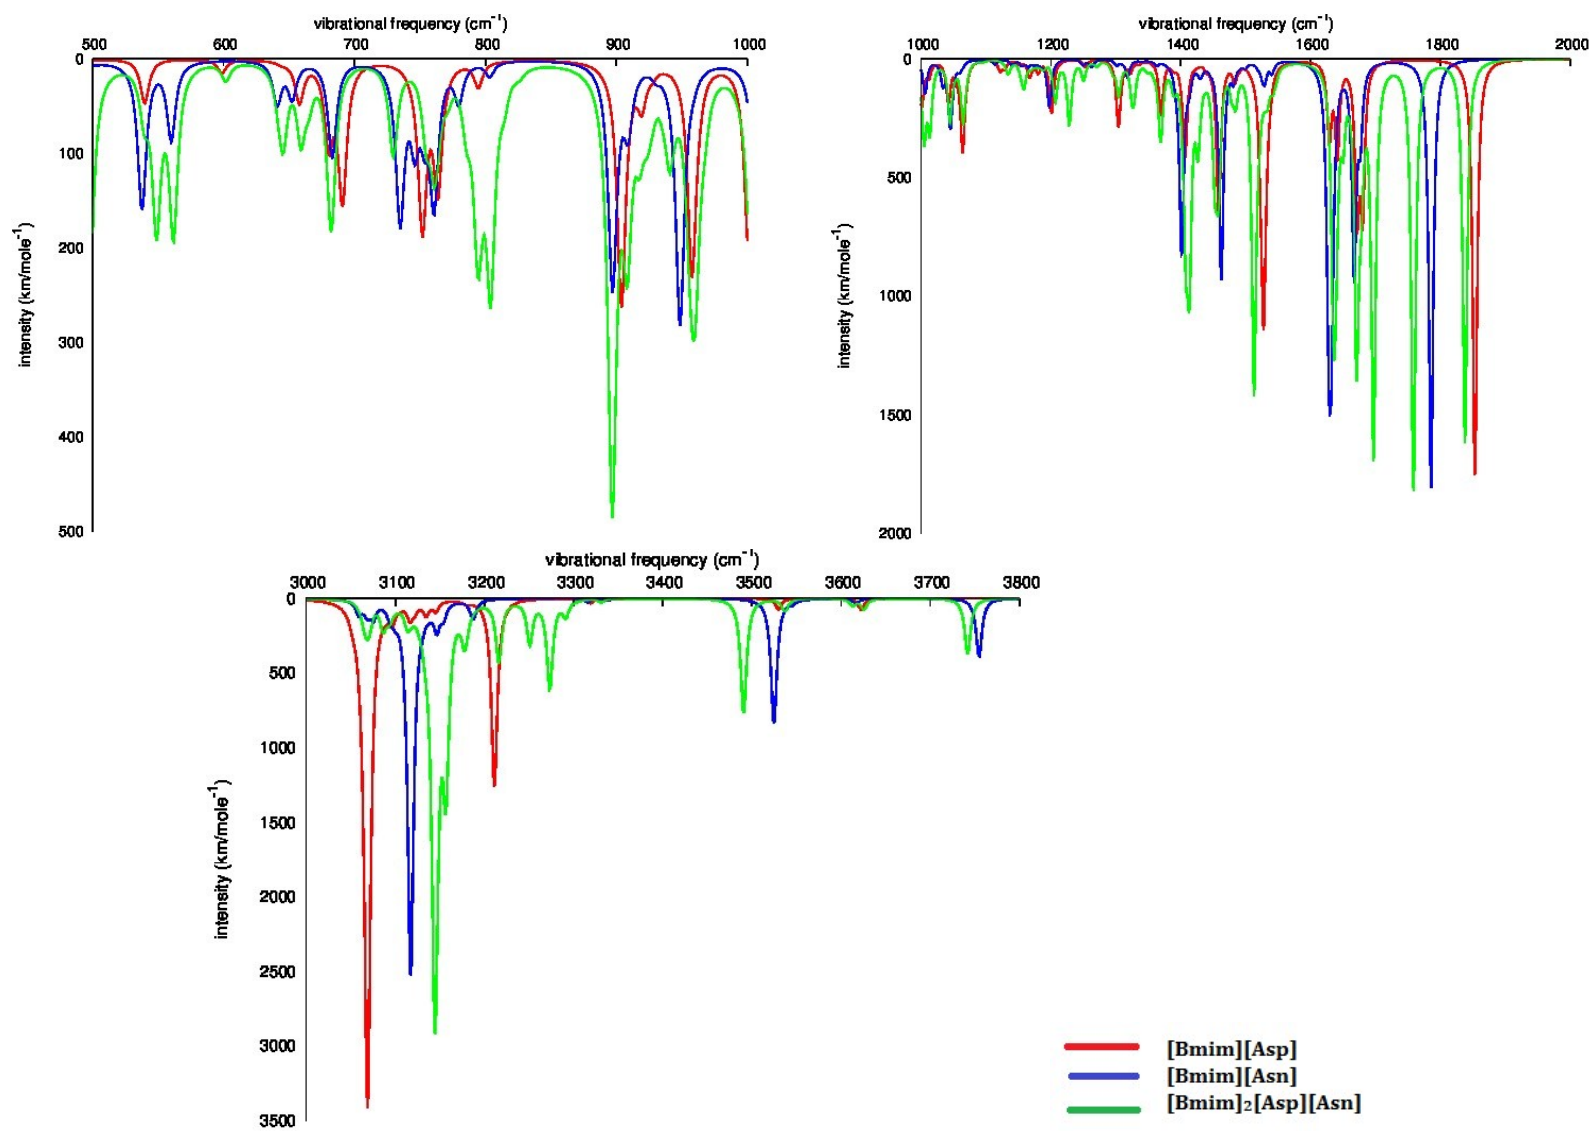

(a) [Bmim]<sub>2</sub>[Asp][Asn]

Figure S12 contd.



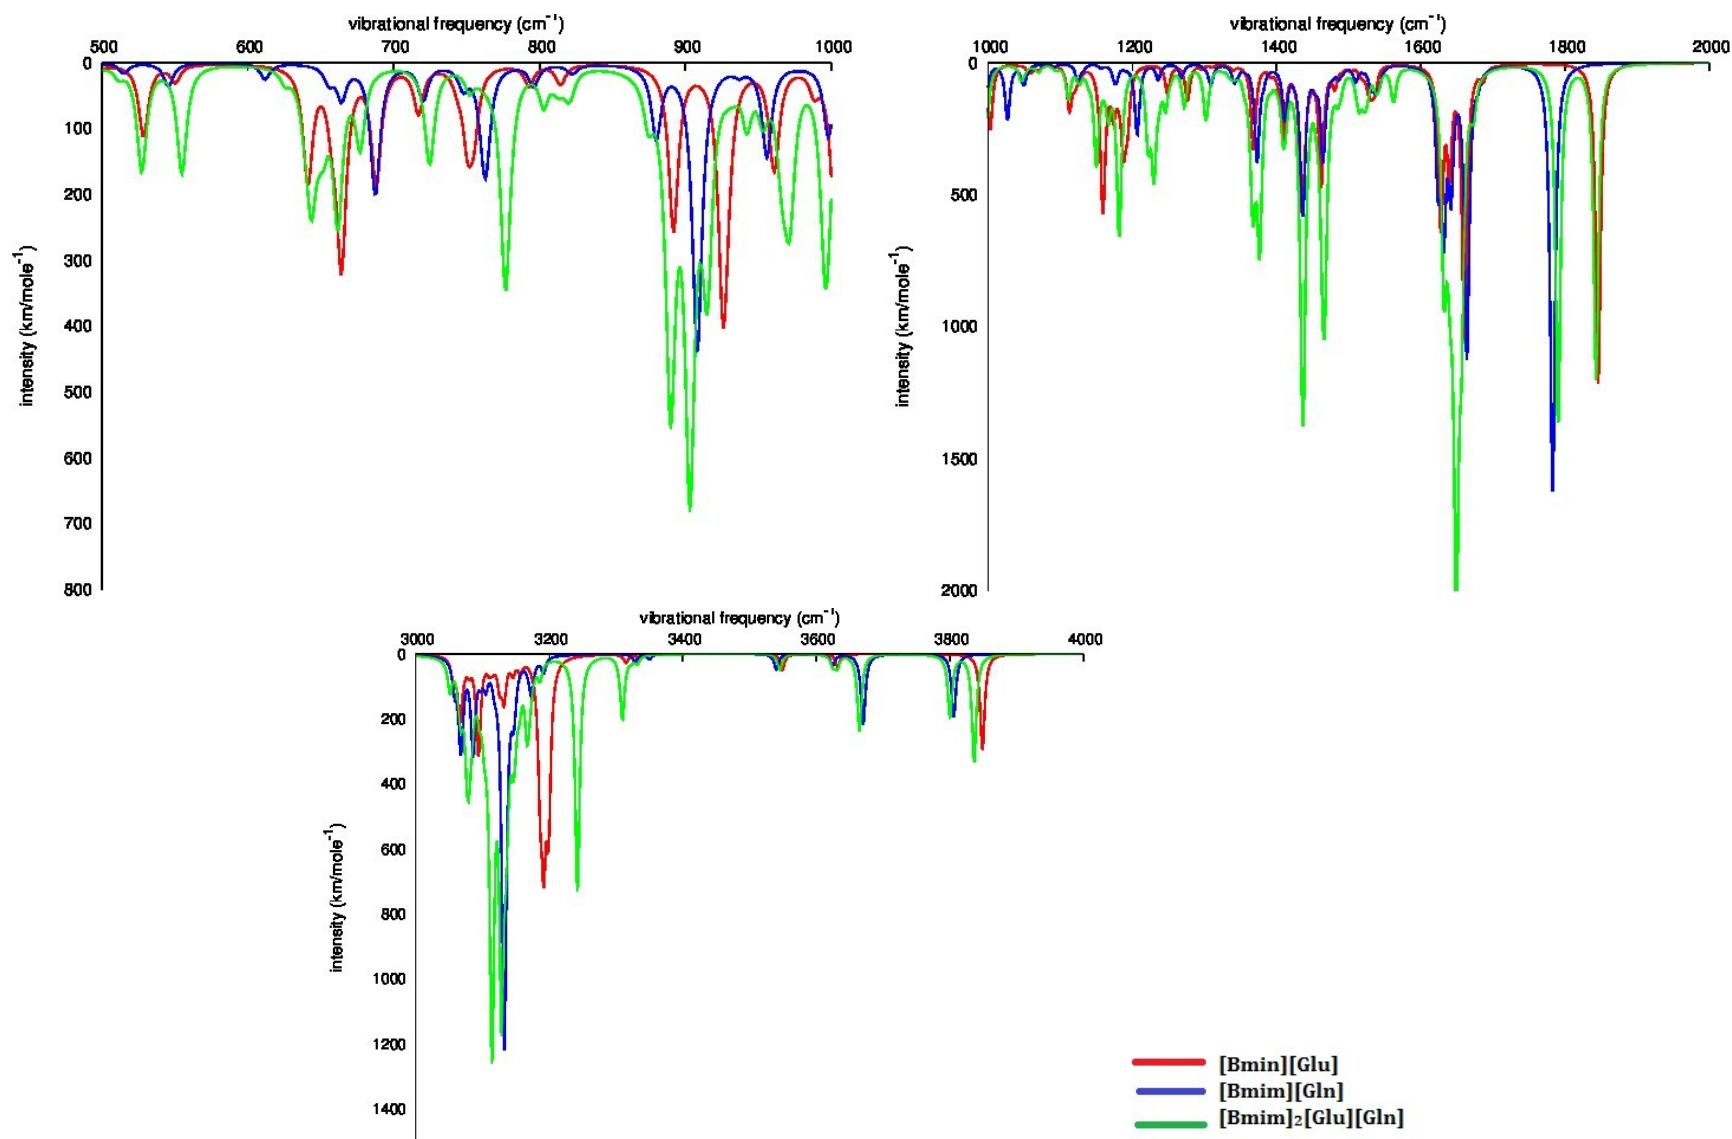

(b) [Bmim]<sub>2</sub>[Glu][Gln]

Figure S12
